1 **Diversification of mammalian deltaviruses by host shifting**

2

3 Laura M. Bergner<sup>1,2\*</sup>, Richard J. Orton<sup>2</sup>, Alice Broos<sup>2</sup>, Carlos Tello<sup>3,4</sup>, Daniel J. Becker<sup>5-7</sup>, Jorge

4 E. Carrera<sup>8-9</sup>, Arvind H. Patel<sup>2</sup>, Roman Biek<sup>1</sup>, Daniel G. Streicker<sup>1,2</sup>

5

6 <sup>1</sup> Institute of Biodiversity, Animal Health and Comparative Medicine, College of Medical,

7 Veterinary and Life Sciences, University of Glasgow, Glasgow, United Kingdom

8 <sup>2</sup> MRC–University of Glasgow Centre for Virus Research, Glasgow, United Kingdom

9 <sup>3</sup> Association for the Conservation and Development of Natural Resources, Lima, Perú

10 <sup>4</sup> Yunkawasi, Lima, Perú

11 <sup>5</sup> Odum School of Ecology, University of Georgia, Athens, USA

12 <sup>6</sup> Center for the Ecology of Infectious Diseases, University of Georgia, Athens, USA

13 <sup>7</sup> Department of Biology, Indiana University, Bloomington, USA

14 <sup>8</sup> Departamento de Mastozoología, Museo de Historia Natural, Universidad Nacional Mayor de

15 San Marcos, Lima, Perú

16 <sup>9</sup> Programa de Conservación de Murciélagos de Perú, Piura, Perú

17

18 \*Corresponding author: Laura Bergner ([Laura.Bergner@glasgow.ac.uk](mailto:Laura.Bergner@glasgow.ac.uk))

19

20 **Abstract**

21 Hepatitis delta virus (HDV) is an obligate hyper-parasite that increases the severity of hepatitis B  
22 virus (HBV) in humans. The origins of HDV and the mechanisms through which it and related  
23 animal deltaviruses diversify are unknown. We report the epidemiology and evolutionary history  
24 of new mammal-infecting deltaviruses. Despite geographic under-representation in over 348  
25 terabases of globally-distributed RNA sequence data from mammals, deltaviruses originated  
26 exclusively from the Americas, infecting bats, rodents and a cervid. Phylogenetic analyses  
27 revealed multiple host shifts among mammalian orders. Consistent absence of HBV-like viruses  
28 in two deltavirus-infected bat species indicated acquisitions of novel helper viruses during the  
29 divergence of animal and human-infecting deltaviruses. Our analyses support an American  
30 zoonotic origin of HDV and show that deltaviruses can diversify by host shifting despite  
31 dependence on unrelated viruses.

32

33

34

35

36

37

38

39

40

41

42

43

44

45

46

47

48

49

50

## 51 Main Text

52 Hepatitis delta virus (HDV) is a globally-distributed human pathogen which causes the most  
53 severe form of viral hepatitis in an estimated 20 million people. Unlike typical viruses, HDV is  
54 an obligate ‘satellite’ virus that is replicated by diverse host cells, but requires the envelope of an  
55 unrelated ‘helper’ virus (classically hepatitis B virus, HBV, family *Hepadnaviridae*) for cellular  
56 entry, egress and transmission (1). The peculiar life history of HDV together with its lack of  
57 sequence homology to known viral groups has made the evolutionary origins of HDV a  
58 longstanding puzzle. Geographic associations of most HDV genotypes point to an Old World  
59 origin. Yet, historical explanations of the mechanistic origin of HDV spanned from emergence  
60 from the mRNA of a HBV-infected human (2) to ancient evolution from viroids (circular, single-  
61 stranded RNA pathogens of plants) (3). More recently, discoveries of HDV-like genomes in  
62 vertebrates and invertebrates (4-7) overturned the decades-long belief that deltaviruses  
63 exclusively infect humans. These discoveries also suggested new models of deltavirus evolution,  
64 in which viruses either co-specified with their hosts over ancient timescales or possess an  
65 unrecognized capacity for host shifting which would imply their potential to emerge in novel  
66 species.

67 Efforts to distinguish competing evolutionary hypotheses for deltaviruses have been  
68 precluded by the remarkably sparse distribution of currently-known HDV-like agents across the  
69 animal tree of life. Single representatives are reported from arthropods (Subterranean termite,  
70 *Schedorhinotermes intermedius*), fish (a pooled sample from multiple species), birds (a pooled  
71 sample from 3 duck species, *Anas gracilis*, *A. castanea*, *A. superciliosa*), reptiles (Common boa,  
72 *Boa constrictor*) and mammals (Tome’s spiny rat, *Proechimys semispinosus*), and only two are  
73 known from amphibians (Asiatic toad, *Bufo gargarizans*; Chinese fire belly newt, *Cynops*  
74 *orientalis*) (4-7). Most share minimal homology with HDV, even at the protein level (< 25%),  
75 frustrating robust phylogenetic re-constructions of evolutionary histories (Fig. S1). On the one  
76 hand, the distribution of deltaviruses may reflect rare host shifting events among divergent taxa.  
77 Alternatively, reliance on untargeted metagenomic sequencing (a relatively new and selectively  
78 applied tool) to find novel species may mean that the distribution of deltaviruses in nature is  
79 largely incomplete (8, 9). Additional taxa could reveal ancient co-speciation of HDV-like agents  
80 with their hosts or evidence for host shifting.

81 We sought to fill gaps in the evolutionary history of mammalian deltaviruses, the group  
82 most likely to clarify the origins of HDV. We used a two-pronged approach (Materials and  
83 Methods). First, we used data from Serratus, a newly developed bioinformatic platform which  
84 screens RNA sequences from the NCBI Short Read Archive (SRA) for similarity to known  
85 viruses and which is described by Edgar *et al.* (10). We focused on search results from 96,695  
86 transcriptomic and metagenomic datasets, comprising 348 terabases of RNA sequences from 403  
87 species across 24 mammalian orders (22 terrestrial, 2 aquatic; Data S1). Although domesticated  
88 animals comprised the largest single fraction of the dataset (67.2%), remaining data were from a  
89 variety of globally-distributed species (Fig 1A,B). Our second search was prompted by our  
90 earlier detection of uncharacterized deltavirus-like sequences in a neotropical bat (11) and  
91 evidence of under-representation in the volume of neotropical bat data in the SRA (Fig. 1A). We  
92 therefore carried out metagenomic sequencing of 23 frugivorous, insectivorous, nectarivorous,  
93 and sanguivorous bat species from Peru, using 59 samples available within our laboratory (Table  
94 S1). All datasets containing sequences with significant protein homology to deltaviruses were  
95 subjected to *de novo* genome assembly.

96 Searches revealed five deltaviruses spanning three mammalian orders: Artiodactyla  
97 (N=1), Chiroptera (N=3), and Rodentia (N=1; Fig. 1C). Strikingly, despite over-representation of  
98 Old World-derived data by factors of 4.3 (Artiodactyla), 5.8 (Chiroptera), 2.1 (Rodentia), all new  
99 mammalian deltaviruses originated from North and South American species (Supplementary  
100 Results Section 1, Fig. 1A,C). Chiropteran deltaviruses included two genotypes from common  
101 vampire bats (*Desmodus rotundus*) which shared only 48.4-48.6% genome-wide nucleotide (nt)  
102 identity (hereafter, DrDV-A and DrDV-B; Fig. S1). A third deltavirus was identified in a liver  
103 transcriptome (accession SRR7910143; (12)) from a lesser dog-like bat (*Peropteryx macrotis*)  
104 from Mexico (PmacDV), but was more closely related to recently described deltaviruses from  
105 Tome's spiny rat from Panama (PsemDV; (7)), sharing 95.9-97.4% (amino acid) and 93.0-95.7%  
106 (nt) identity. Additional genomes were recovered from transcriptomes derived from the pedicle  
107 tissue of a white-tailed deer (*Odocoileus virginianus*; OvirDV; accession SRR4256033; (13))  
108 and from a captive-born Eastern woodchuck (*Marmota monax*; MmonDV; accession  
109 SRR2136906; (14)). Bioinformatic screens recovered additional reads matching each genome in  
110 related datasets (either different individuals from the same study or different tissues from the  
111 same individuals), suggesting active infections (Table S2). All genomes had lengths 1669-1771

112 nucleotides, high intramolecular base pairing, and contained genomic and antigenomic  
 113 ribozymes characteristic of deltaviruses. The DrDV-A and DrDV-B genomes are more fully  
 114 characterized in Fig S2, Fig S3, Table S3 and Supplementary Results Section 2. The other  
 115 genomes and a case study on MmonDV infections in animals inoculated with woodchuck  
 116 hepatitis virus are described by Edgar *et al.* (10).

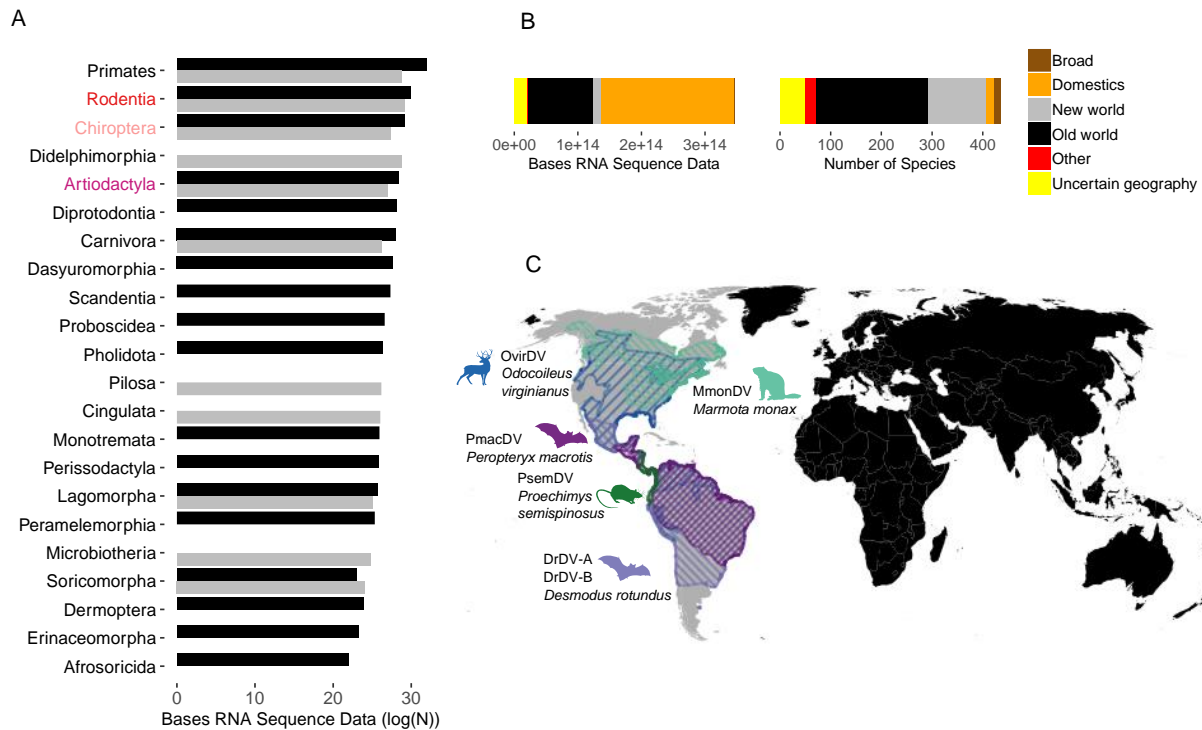

117  
 118 **Fig. 1. Geographic and taxonomic distribution of mammalian datasets and novel**  
 119 **deltaviruses.** (A) The host and geographic distribution of metagenomic and transcriptomic  
 120 datasets searched for novel deltaviruses, note the log scale. Colors indicate orders (red =  
 121 Rodentia; pink = Chiroptera; Purple = Artiodactyla). (B) Stacked bar charts show the volume of  
 122 mammalian datasets in units of RNA bases and the number of species searched, separated by  
 123 species geography. Additional segments describe widely distributed domesticated animals  
 124 (Domestics), datasets with genus-level metadata from broadly-distributed genera (Broad),  
 125 datasets from cell lines or with taxonomic information only at the Class level (Other), and those  
 126 which had no geographic range data available (Uncertain geography, mostly aquatic mammals).  
 127 (C) Host distributions of newly discovered and recently reported deltaviruses, color coded by  
 128 mammalian species (Data from IUCN). All except PsemDV were discovered through our search.  
 129  
 130

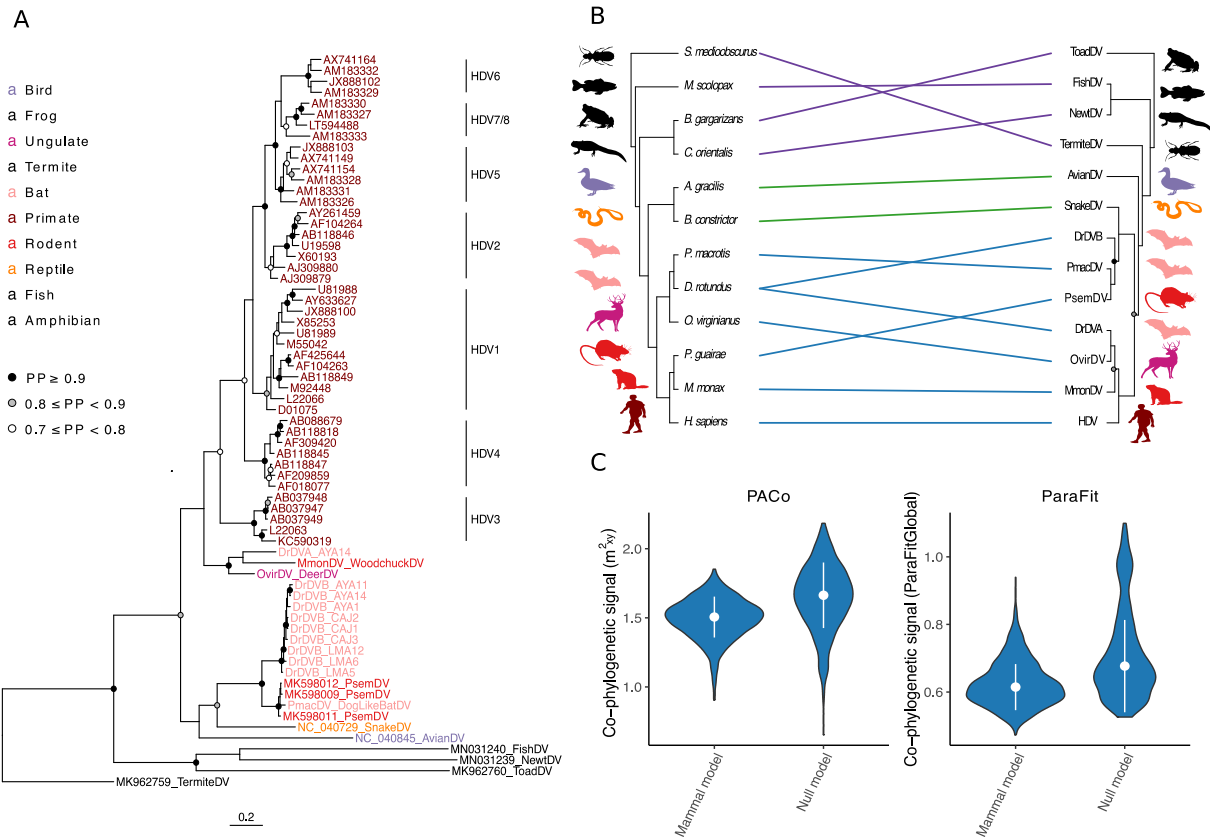

131  
 132 **Fig. 2. Evolutionary history of deltaviruses reveals host shifts among mammals.** (A) Bayesian  
 133 phylogeny of a 192 amino acid alignment of the DAG. Ingroup taxa including mammal, snake and  
 134 avian deltaviruses are colored by order; other HDV-like taxa are shown in black. (B) Co-phylogeny  
 135 depicting connections between the consensus deltavirus phylogeny from StarBeast and the host  
 136 tree (from TimeTree.org). Links are colored according to subsets of data used in co-phylogenetic  
 137 analyses; all taxa (purple + green + blue), ingroup (green + blue), or mammal (blue). Host taxa  
 138 are: *Schedorhinotermes medioobscurus*, *Macroramphosus scolopax*, *Bufo gargarizans*, *Cynops*  
 139 *orientalis*, *Anas gracilis*, *Boa constrictor*, *Peroptryx macrotis*, *Desmodus rotundus*, *Odocoileus*  
 140 *virginianus*, *Proechimys guirae*, *Marmota monax*, and *Homo sapiens*. (C) Absence of  
 141 phylogenetic dependence of the mammalian deltavirus phylogeny on the host phylogeny. Violin  
 142 plots show distributions of test statistics from two co-phylogenetic approaches across 1,000  
 143 posterior trees relative to null models, along with medians and standard deviations. For PACo,  
 144 higher values would indicate greater phylogenetic dependence; for ParaFit, lower values. Both  
 145 approaches rejected a global model of co-speciation ( $P > 0.05$ ).  
 146

147 Phylogenetic analysis of the small delta antigen (DAG) protein sequences using MrBayes  
 148 (Fig. 2A) and a multi-species coalescent model in StarBeast (Fig. 2B) revealed multiple putative  
 149 host shifts within the evolutionary history of mammalian deltaviruses. For instance, vampire bat  
 150 deltaviruses were paraphyletic, suggesting at least two independent incursions into this species.  
 151 Specifically, DrDV-A formed a clade with OvirDV and MmonDV (posterior probability,  $PP =$

152 0.99/0.80 in MrBayes and StarBeast respectively) which was basal to HDV ( $PP = 0.65/0.81$ ),  
153 while DrDV-B shared a most recent common ancestor with PmacDV and PsemDV ( $PP = 1/1$ ).  
154 Rodent-associated deltaviruses (MmonDV and PsemDV) were also highly divergent and  
155 paraphyletic. Consequently, co-phylogenetic analyses using 1,000 randomly sampled topologies  
156 from StarBeast failed to reject independence of mammal and deltavirus phylogenies, consistent  
157 with a model of diversification by host shifting (Fig. 2B,C). Analyses of all deltavirus-host pairs  
158 (i.e. including highly divergent HDV-like agents) and an ‘ingroup’ clade containing mammalian  
159 along with avian and snake deltaviruses revealed somewhat greater dependence of the deltavirus  
160 phylogeny on the host phylogeny (Fig. S4). However, statistical significance varied across co-  
161 phylogenetic approaches and topological incongruences were evident among non-mammals,  
162 excluding co-speciation as the sole diversification process, even in deeper parts of the co-  
163 evolutionary history (Fig. S5, Supplementary Results Section 3).

164 Having extended the mammalian host range of deltaviruses to neotropical bats, we  
165 subsequently explored the transmission dynamics, host range, and candidate helper virus  
166 associations within this group through a field study in three regions of Peru (Fig. 3A). Out of 240  
167 *D. rotundus* saliva samples from 12 bat colonies collected in 2016-2017, RT-PCR targeting the  
168 DA<sub>g</sub> detected DrDV-A in single adult female from one of the two metagenomic pools that  
169 contained this genotype (bat ID 8299, site AYA14, Table S4, S5). In contrast, DrDV-B was  
170 detected in 17.1% of *D. rotundus* saliva samples (colony-level prevalence: 0-35%). Prevalence  
171 varied neither by region of Peru (Likelihood ratio test;  $\chi^2 = 3.21$ ; d.f. = 2;  $P = 0.2$ ) nor by bat age  
172 or sex (binomial generalized linear mixed model, Age:  $P = 0.38$ ; Sex:  $P = 0.87$ ), suggesting  
173 geographic and demographic ubiquity of infections. Given that vampire bats subsist on blood,  
174 deltavirus sequences encountered in bat saliva might represent contamination from infected prey.  
175 A small set of blood samples screened for DrDV-A ( $N = 60$ , including bat 8299) were negative.  
176 However, 6 out of 41 bats that were DrDV-B negative and 4 out of 18 bats with DrDV-B in  
177 saliva also contained DrDV-B in blood samples (Fig. 3B). In the 4 individuals with paired saliva  
178 and blood samples, DA<sub>g</sub> sequences were identical, supporting systemic infections. Significant  
179 spatial clustering of DrDV-B sequences at both regional and bat colony levels further supported  
180 local infection cycles driven by horizontal transmission among vampire bats (Fig. 3A; Table S6).

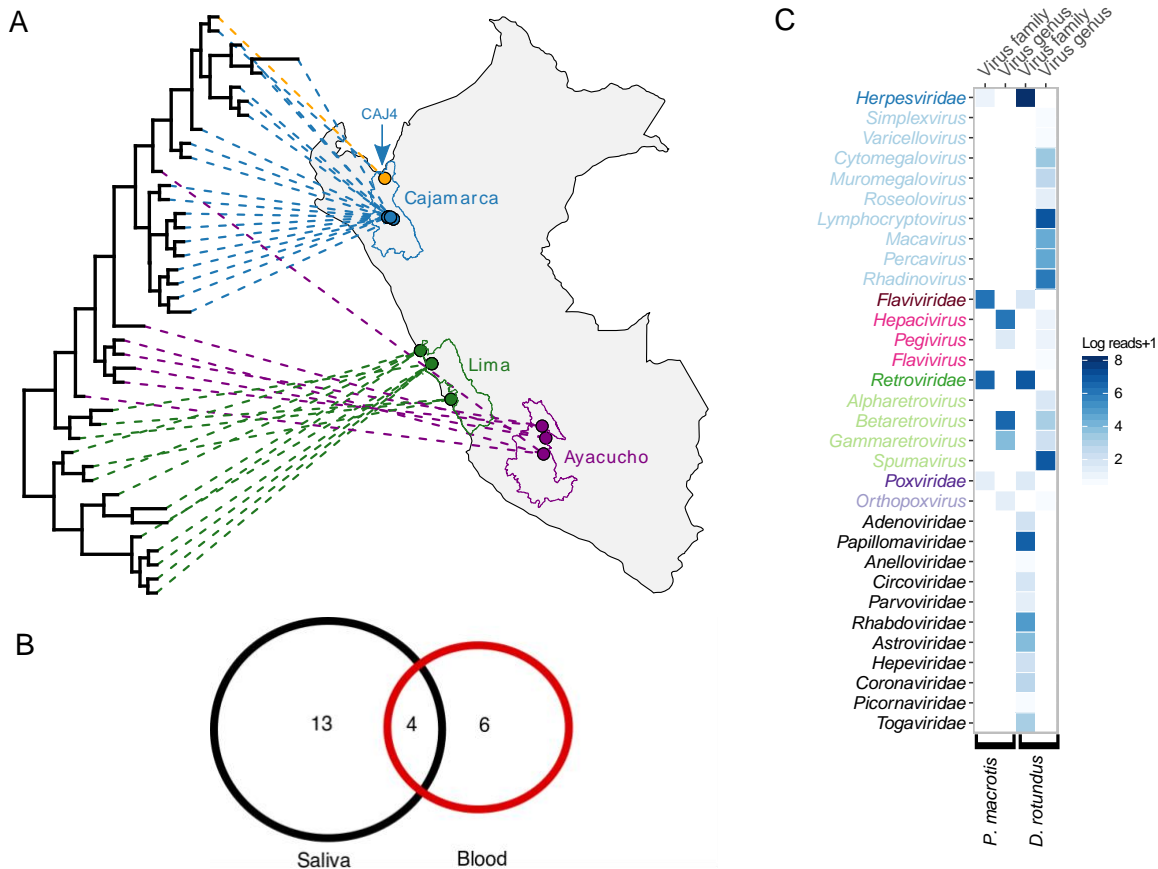

181

182 **Fig. 3. Transmission biology and candidate helper viruses for bat deltaviruses.** (A) Bayesian  
 183 phylogeny of a 214 nt alignment of DrDV-B DAg projected onto vampire bat capture locations  
 184 in Peru. Lines and points are colored by administrative regions. Site CAJ4, where the *C.*  
 185 *perspicillata* sequence was detected, is depicted in orange. (B) DrDV-B detections in saliva and  
 186 blood. Numbers represent individual bats; the four bats in the center had genetically identical  
 187 DrDV-B sequences in saliva and blood. (C) Mammal-infecting viral communities are shown for  
 188 the *P. macrotis* liver transcriptome which contained PmacDV and combined *D. rotundus* saliva  
 189 metagenomes. Viral taxa are colored by family, with lighter shades indicating genera within  
 190 families, for overlapping viral families in both bat species. Viral families only present in one bat  
 191 species are shown in black. Candidate helpers for OvirDV and MonDV are shown in Fig. S8.  
 192

193 Given the evolutionary evidence for deltavirus host shifts, we hypothesized that spillover  
 194 infections might also occur at detectable frequencies in sympatric neotropical bats. Among 87  
 195 non-*D. rotundus* bats captured in or outside of *D. rotundus*-occupied roosts, RT-PCR detected  
 196 deltavirus RNA in the saliva of a single Seba's short-tailed bat (*Carollia perspicillata*; N=31  
 197 individuals; Fig. S6). This result was unlikely attributable to erroneous bat species assignment or  
 198 laboratory contamination (Supplementary Results, Section 4). The partial DAg recovered from



199 the *C. perspicillata* was identical to a DrDV-B strain collected from a vampire bat in the same  
200 roost (CAJ4; Fig. 3A). Given the rapid evolution expected in deltaviruses (ca.  $10^{-3}$   
201 substitutions/site/year), genetic identity is most parsimoniously explained as horizontal  
202 transmission from *D. rotundus* to *C. perspicillata*, which was followed by an absence of (or  
203 short-lived) transmission among *C. perspicillata* at the time of sampling (15). This finding  
204 therefore demonstrates cross-species transmission on ecological timescales, a defining  
205 prerequisite for evolutionary diversification of deltaviruses through host shifting.

206 Finally, we evaluated whether bat deltaviruses use hepadnavirus helpers akin to HDV (1).  
207 Consistent with a previous study, PCR screens of DrDV-positive and negative saliva (N=54) and  
208 blood samples (N=119), found no evidence of hepadnaviruses in vampire bats (16). To rule out  
209 divergent hepadnaviruses missed by PCR, we next used a bioinformatic pipeline to characterize  
210 viral communities in the metagenomic and transcriptomic datasets from deltavirus-infected bat  
211 species (Materials and Methods). Hepadnaviruses were again absent from all datasets (Fig. 3C).  
212 Together with the finding that all three bat-infecting deltavirus genomes lacked the farnesylation  
213 site thought to facilitate acquisition of the hepadnaviral envelope (Supplementary Results,  
214 Section 2), use of hepadnavirus helpers by bat deltaviruses seems unlikely. To identify  
215 alternative plausible candidates, we quantified the abundance (approximated by sequence reads)  
216 of viral taxa that overlapped between the two deltavirus-infected bat species, *P. macrotus* and *D.*  
217 *rotundus*. In the *P. macrotus* liver which contained PMacDV, reads from hepaciviruses  
218 (*Flaviviridae*) spanned a complete viral genome and outnumbered all other viral genera with the  
219 exception of Betaretroviruses, whose abundance reflects endogenization in the host genome (Fig.  
220 3C). Lower, but detectable, hepacivirus abundance in vampire bats may reflect the tissue tropism  
221 of these viruses or pooling of samples from multiple individuals. Intriguingly, hepaciviruses  
222 experimentally mobilize HDV *in vitro* and were found in 26 out of 30 PsemDV-infected rats (7,  
223 17). Reads matching Poxviridae formed small contigs in both libraries (*P. macrotus*: 229-1386  
224 nt; *D. rotundus*: 358 nt) and particularly in *D. rotundus*, could not be excluded as false positives.  
225 Although non-opportunistic sampling is required to decisively identify the helpers of bat  
226 deltaviruses, existing evidence points to hepaciviruses as top contenders, perhaps using  
227 alternative enveloping mechanisms to HDV.

228 Unlike conventional pathogens (e.g., viruses, bacteria, protozoans), the obligatory  
229 dependence of deltaviruses on evolutionarily independent helpers creates a barrier to cross-

230 species transmission that might be expected to promote host specificity. Data to test this  
231 hypothesis have been unavailable until now. Our study demonstrates transmission of deltaviruses  
232 among highly divergent mammalian orders on both ecological and evolutionary timescales.

233 Deltavirus host shifts could conceivably arise through several processes. Mobilization by  
234 non-viral micro-organisms (e.g., intra-cellular bacteria) is conceivable but has never been  
235 observed. Unaided spread through a yet undefined mechanism is also possible. However, given  
236 that the best-studied deltavirus (HDV) depends on viral envelopes to complete its life cycle and  
237 that conserved genomic features in related deltaviruses suggest a similar life history strategy,  
238 helper virus mediated host shifting is the most reasonable expectation. We and others have  
239 excluded hepadnavirus helpers for PmacDV, DrDVs, and PsemDV, yet natural HDV infections  
240 consistently involve HBV (1, 7). In light of this and the evidence presented here for host shifts  
241 among mammals, the contemporary HDV-HBV association must have arisen through acquisition  
242 of the hepadnaviral helper somewhere along the evolutionary divergence separating human and  
243 other mammal-infecting deltaviruses. Evidence that deltaviruses can exploit diverse enveloped  
244 viruses experimentally adds further weight to this conclusion (17, 18). As several new  
245 mammalian deltaviruses were detected with hepacivirus and poxvirus co-infections, either  
246 simultaneous host shifts of deltaviruses and helpers, or preferential deltavirus shifting among  
247 host species that are already infected with compatible helpers are plausible. Conclusively  
248 identifying the helper associations of novel mammalian deltaviruses and their evolutionary  
249 relationships will be crucial to disentangling these possibilities.

250 A limitation of our study was that the species in which novel deltaviruses were  
251 discovered were presumed to be definitive hosts (i.e. capable of sustained horizontal  
252 transmission). Consequently, some putative host shifts detected in our co-phylogenetic analysis  
253 may represent short-lived transmission chains in novel hosts or singleton infections, analogous to  
254 our observation of DrDV-B in *C. perspicillata*. For example, PmacDV from the Lesser dog-like  
255 bat clustered within the genetic diversity of PsemDV from rats, but infected two out of three  
256 individual bats analyzed, suggesting a recent cross-species transmission event followed by some  
257 currently unknown amount of onward transmission. Irrespective of the long-term outcomes of  
258 index infections, our results unequivocally support the conclusion that deltaviruses can transmit  
259 between divergent mammalian orders. The global distribution of deltavirus positive and negative  
260 datasets provides additional, independent evidence for host shifts. Even allowing for sub-

261 detection due to variation in infection prevalence and dataset quality, deltaviruses should have  
262 been more widespread across the mammalian phylogeny than we observed (ca. 1% of species  
263 analyzed) if they co-specified with their hosts. Moreover, the three deltavirus-infected  
264 mammalian orders occur in both the New and Old Worlds, yet non-human deltaviruses occurred  
265 exclusively in the Americas. Sampling biases cannot readily explain this pattern. By most  
266 metrics of sequencing effort, Old World mammals were over-represented each deltavirus-  
267 infected mammalian order, including at finer continental scales (Supplementary Results, Section  
268 1). Despite the large scale of our search, we evaluated < 10% of mammalian species. We  
269 therefore anticipate further discoveries of mammalian deltaviruses. Crucially, however, new  
270 viruses could not re-unite the paraphyletic rodent and bat deltaviruses or resolve widespread  
271 incongruence between mammal and deltavirus phylogenies, making our conclusions on host  
272 shifting robust.

273         The origin of HDV has been a longstanding mystery thwarted by the absence of closely  
274 related deltaviruses. The addition of 6 new mammalian deltaviruses by ourselves and others  
275 allowed us to re-evaluate this question (7, 10). The pervasiveness of host shifting among  
276 deltaviruses and our discovery of a clade of mammalian deltaviruses basal to HDV (albeit with  
277 variable support depending on phylogeny,  $PP = 0.64-0.81$ ) strongly points to a zoonotic origin.  
278 Although the exact progenitor virus remains undiscovered, the exclusive detection of mammalian  
279 deltaviruses in the New World species supports an “out of the Americas” explanation for origin  
280 and global spread of HDV (Fig. 1). The basal placement of the highly divergent Amazonian  
281 HDV genotype (HDV-3) within the phylogeny lends further credence to this scenario. Though  
282 circumstantial, the earliest records of HDV are from the Amazon basin in the 1930s (19). The  
283 greater diversity of HDV genotypes outside of the Americas – long argued to support an Old  
284 World origin – may instead reflect diversification arising from geographic vicariance within  
285 human populations.

286         Our results show that deltaviruses jump between mammalian host species through an  
287 unusual process that most likely requires parasitizing evolutionarily independent viruses. Since  
288 satellite viruses in general and HDV in particular tend to alter the pathogenesis and  
289 transmissibility of their helpers (20), our findings imply the potential for deltaviruses to act as  
290 host-switching virulence factors that could alter the progression of viral infections in multiple  
291 host species. Constraints on future host shifts are likely to differ from those of conventional

292 animal pathogens. Specifically, given the broad cellular tropism of deltaviruses, interactions with  
293 helpers would likely be more important determinants of cross-species transmission than  
294 interactions with their hosts (17, 18). Consequently, anticipating future host shifts requires  
295 understanding the determinants and plasticity of deltavirus and helper compatibility along with  
296 the ecological factors that enable cross-species exposure.

297

## 298 **Acknowledgments**

299 We thank Jaime Pacheco, Luigi Carrasco, Yosselym Luzon, Saori Grillo and Megan Griffiths for  
300 field and laboratory assistance; Megan Griffiths, Joseph Hughes, and Matt Hutchinson for  
301 analysis advice; and Ana da Silva Filipe, Felix Drexler and Pablo Murcia for comments on  
302 earlier versions of the manuscript. We thank the Serratus team, particularly Artem Babaian and  
303 Robert Edgar for assistance with Serratus. **Funding:** Funding was provided by the Wellcome  
304 Trust (Institutional Strategic Support Fund Early Career Researcher Catalyst Grant; Wellcome-  
305 Beit Prize:102507/Z/13/A; Senior Research Fellowship: 102507/Z/13/Z), the Human Frontiers  
306 Science Program (RGP0013/2018), and the Medical Research Council (MC\_UU\_12014/12).  
307 Additional support was provided by the National Science Foundation (Graduate Research  
308 Fellowship and DEB-1601052), ARCS Foundation, Sigma Xi, Animal Behavior Society, Bat  
309 Conservation International, American Society of Mammalogists, Odum School of Ecology,  
310 UGA Graduate School, UGA Latin American and Caribbean Studies Institute, UGA Biomedical  
311 and Health Sciences Institute, and the Explorer's Club. **Competing interests:** Authors declare no  
312 competing interests. **Data and materials availability:** DrDV genome sequences are available on  
313 Genbank (accessions MT649206- MT649209). PmacDV, OvirDV and MmonDV genome  
314 sequences are available at <https://serratus.io/access>. Peruvian bat metagenomes are available in  
315 ENA project PRJEB35111. Scripts used for bioinformatic analyses are available on GitHub  
316 (<https://github.com/rjorton/Allmond>). **Author contributions:** Conceptualization (LMB, RJO,  
317 AHP, RB, DGS); formal analysis (LMB, RJO, DGS), funding acquisition (LMB, DGS);  
318 investigation (LMB, AB); resources (DJB, CT, JEC); supervision (AHP, RB, DGS); writing –  
319 original draft (LMB, DGS); all authors contributed to review and editing of the manuscript.

## 320 **Supplementary Materials:**

321 Materials and Methods

322 Supplementary Results

323 Figures S1-S8

324 Tables S1-S6

325 Supplementary References

326

327

328

329 **References**

- 330 1. L. Magnius *et al.*, ICTV Virus Taxonomy Profile: Deltavirus. *J Gen Virol.* **99**, 1565–1566  
331 (2018).
- 332 2. K. Salehi-Ashtiani, A. Lupták, A. Litovchick, J. W. Szostak, A genomewide search for  
333 ribozymes reveals an HDV-like sequence in the human CPEB3 gene. *Science.* **313**, 1788–  
334 1792 (2006).
- 335 3. S. F. Elena, J. Dopazo, R. Flores, T. O. Diener, A. Moya, Phylogeny of viroids, viroidlike  
336 satellite RNAs, and the viroidlike domain of hepatitis delta virus RNA. *Proc Natl Acad*  
337 *Sci USA.* **88**, 5631–5634 (1991).
- 338 4. M. Wille *et al.*, A Divergent Hepatitis D-Like Agent in Birds. *Viruses.* **10**, 720–9 (2018).
- 339 5. U. Hetzel *et al.*, Identification of a Novel Deltavirus in Boa Constrictors. *mBio.* **10**, 1447–  
340 8 (2019).
- 341 6. W.-S. Chang *et al.*, Novel hepatitis D-like agents in vertebrates and invertebrates. *Virus*  
342 *Evol.* **5**, vez021 (2019).
- 343 7. S. Paraskevopoulou *et al.*, Mammalian deltavirus without hepadnavirus coinfection in the  
344 neotropical rodent *Proechimys semispinosus*. *Proc Natl Acad Sci USA.* **117**, 17977–17983  
345 (2020).
- 346 8. M. Shi *et al.*, Redefining the invertebrate RNA virosphere. *Nature.* **540**, 539–543 (2016).
- 347 9. M. Shi *et al.*, The evolutionary history of vertebrate RNA viruses. *Nature.* **556**, 197–202  
348 (2018).
- 349 10. R. C. Edgar *et al.*, Petabase-scale sequence alignment catalyses viral discovery. *bioRxiv*,  
350 1–30 (2020).
- 351 11. L. M. Bergner *et al.*, Using noninvasive metagenomics to characterize viral communities  
352 from wildlife. *Mol Ecol Resour.* **19**, 128–143 (2019).
- 353 12. D. D. Moreno-Santillán, C. Machain-Williams, G. Hernández-Montes, J. Ortega, De Novo  
354 Transcriptome Assembly and Functional Annotation in Five Species of Bats. *Sci Rep.* **9**,  
355 6222–12 (2019).
- 356 13. C. M. Seabury *et al.*, Genome-Wide Polymorphism and Comparative Analyses in the  
357 White-Tailed Deer (*Odocoileus virginianus*): A Model for Conservation Genomics. *PLOS*  
358 *ONE.* **6**, e15811–9 (2011).
- 359 14. S. P. Fletcher *et al.*, Intrahepatic Transcriptional Signature Associated with Response to  
360 Interferon- $\alpha$  Treatment in the Woodchuck Model of Chronic Hepatitis B. *PLoS Pathog.*  
361 **11**, e1005103–30 (2015).

- 362 15. J. Krushkal, W. H. Li, Substitution rates in hepatitis delta virus. *J Mol Evol.* **41**, 721–726  
363 (1995).
- 364 16. J. F. Drexler *et al.*, Bats carry pathogenic hepadnaviruses antigenically related to hepatitis  
365 B virus and capable of infecting human hepatocytes. *Proc Natl Acad Sci USA.* **110**,  
366 16151–16156 (2013).
- 367 17. J. Perez-Vargas *et al.*, Enveloped viruses distinct from HBV induce dissemination of  
368 hepatitis D virus in vivo. *Nat Commun.* **10**, 2098 (2019).
- 369 18. L. Szirovicza *et al.*, Snake Deltavirus Utilizes Envelope Proteins of Different Viruses To  
370 Generate Infectious Particles. *mBio.* **11** (2020), doi:10.1128/mBio.03250-19.
- 371 19. M. V. Alvarado-Mora *et al.*, Dynamics of hepatitis D (delta) virus genotype 3 in the  
372 Amazon region of South America. *Infect Genet Evol.* **11**, 1462–1468 (2011).
- 373 20. P. Gnanasekaran, S. Chakraborty, Biology of viral satellites and their role in pathogenesis.  
374 *Curr Opin Virol.* **33**, 96–105 (2018).

375  
376  
377  
378  
379  
380  
381  
382  
383  
384  
385  
386  
387  
388  
389  
390  
391  
392

## Supplementary Materials for

### **Diversification of mammalian deltaviruses by host shifting**

Laura M. Bergner, Richard J. Orton, Alice Broos, Carlos Tello, Daniel J. Becker, Jorge E. Carrera, Arvind H. Patel, Roman Biek, Daniel G. Streicker

**This file includes:**

- Materials and Methods
- Supplementary Results
- Figures S1-S8
- Table S1-S6
- Supplementary References

## 393 **Materials and Methods**

### 394 **1. Virus discovery**

#### 395 **a. Serratus**

396 The Serratus platform was used to search published mammalian metagenomic and transcriptomic  
397 sequence datasets available in the NCBI Short Read Archive (SRA). Briefly, Serratus uses a  
398 cloud computing infrastructure to perform ultra-high throughput alignment of publicly available  
399 SRA short read datasets to viral genomes of interest (1). Due to the exceptional computational  
400 demands of this search and mutual interest between ourselves and another research team,  
401 Serratus searches were designed by both teams and carried out at the protein and nucleotide  
402 levels by Edgar *et al.* (1). Query sequences for Serratus searches included all HDV genotypes  
403 and all deltavirus-like genomes which were publicly available at the time of the search (July  
404 2020) along with representative genomes from DrDV-A and DrDV-B, which our team had  
405 already discovered. Results were shared among the two teams who subsequently pursued  
406 complementary lines of investigation. Novel mammalian deltaviruses were discovered using  
407 nucleotide (OvirDV) and amino acid level (Mmon DV and PmacDV) searches of the mammalian  
408 SRA search space.

#### 409 **b. Neotropical bat metagenomic sequencing**

410 Total nucleic acid was extracted from archived saliva swabs from Neotropical bats on a  
411 Kingfisher Flex 96 automated extraction machine (ThermoFisher Scientific) with the Biosprint  
412 One-for-all Vet Kit (Qiagen) using a modified version of the manufacturer's protocol as  
413 described previously (2). Ten pools of nucleic acids from vampire bats and other bat species  
414 were created for shotgun metagenomic sequencing (Table S1). Eight pools comprised samples  
415 from bats in the same genus (2-10 individuals per pool depending on availability of samples, 30  
416  $\mu$ L total nucleic acid per individual). The CAJ1 vampire bat pool from (3) which contained  
417 deltavirus reads was included as a sequencing control. The final pool ("Rare species") comprised  
418 8 other bat species that had only one individual sampled each. Pools were treated with DNase I  
419 (Ambion) and purified using RNAClean XP beads (Agencourt) following (2). Libraries were  
420 prepared using the SMARTer Stranded Total RNA-Seq Kit v2 - Pico Input Mammalian  
421 (Clontech) and sequenced on an Illumina NextSeq500 at The University of Glasgow Polyomics  
422 Facility. Samples were bioinformatically processed for viral discovery as described previously



423 (2), with a slight modification to the read trimming step to account for shorter reads and a  
424 different library preparation kit.

#### 425 **c. DrDV genome assembly and annotation**

426 DrDV genomes were assembled using SPAdes (4) and refined by mapping cleaned reads back to  
427 SPAdes-generated contigs within Geneious v 7.1.7 (5). Regions of overlapping sequence at the  
428 ends of genomes due to linear *de novo* assemblies of circular genomes were resolved manually.  
429 Genome circularity was confirmed based on the presence of overlapping reads across the entire  
430 circular genome of both DrDVs. The amino acid sequence of the small delta antigen protein  
431 (DAg) was extracted from sequences using getorf (6). Other smaller identified open reading  
432 frames did not exhibit significant homology when evaluated by protein blast against Genbank.  
433 Nucleotide sequences of full deltavirus genomes and amino acid sequences of DAg were aligned  
434 along with representative sequences from other deltaviruses using the E-INS-i algorithm in  
435 MAFFT v 7.017 (7). Genetic distances as percent identities were calculated based on an  
436 untrimmed full genome alignment of 2,321bp and an untrimmed delta antigen alignment of  
437 281aa. Protein domain homology of the DAg was analyzed using Hhpred (8). Ribozymes were  
438 identified manually by examining the region upstream of the delta antigen open reading frame  
439 where ribozymes are located in other deltavirus genomes (9, 10). RNA secondary structure and  
440 self-complementarity were determined using the webservers for mFold (11) and RNAstructure  
441 (12). We found no evidence of recombination in nucleotide alignments of DrDV DAg according  
442 to the program GARD (13) on the Datamonkey webserver (14). Genome assembly and  
443 annotation of PmacDV, OvirDV, and MmondDV are described in (1).

#### 444 **d. Evaluation of deltavirus positive cohorts**

445 To establish that deltaviruses were likely to be actively infecting hosts in which they were  
446 detected, and not laboratory contamination or incidental detection of environmentally derived  
447 RNA, we searched for evidence of deltavirus infections in additional samples from the various  
448 studies that detected full genomes. Samples included sequencing libraries derived from both  
449 different individuals in the same study and different tissues from the same individuals. Searches  
450 used bwa (15) to map raw reads from deltavirus positive cohorts to the corresponding novel  
451 deltavirus genomes which had been detected in those same cohorts. Genome remapping was  
452 performed for all vampire bat libraries, two other *Peropteryx macrotis* libraries and all other  
453 Neotropical bat species sequenced in the same study (16) and other pooled tissue samples

454 sequenced by RNASeq from *Odocoileus virginianus* in the same study (17). Results are shown  
455 in Table S2. Deltavirus reads from additional individuals and timepoints from the *Marmota*  
456 *monax* study (18) are described in (1).

#### 457 **e. Global biogeographic analysis of deltavirus presence and absence**

458 To characterize the global distribution of mammal-infecting deltaviruses, we used the metadata  
459 of each SRA accession queried in the Serratus search to identify the associated host. We focused  
460 primarily on the mammalian dataset, which was generated by the SRA search query  
461 (“Mammalia”[Organism] NOT “Homo sapiens”[Organism] NOT “Mus musculus”[Organism])  
462 AND (“type\_rnaseq”[Filter] OR “metagenomic”[Filter] OR “metatranscriptomic”[Filter]) AND  
463 “platform illumina”[Properties]. All analyses were performed in R version 3.5.1 ((19). We  
464 removed libraries with persistent errors which had not completed in the Serratus search. For  
465 remaining libraries, when host identification information was available to the species level, we  
466 matched Latin binomial species names to Pantheria, a dataset which contains the centroids of  
467 mammalian geographic distributions, and used an R script to assign species to continents using  
468 these geographic data (20). Subspecies present in scientific names of SRA meta-data were re-  
469 assigned to species level and recently updated binomial names were changed to match the  
470 Pantheria dataset. Due to the fact that mammalian taxonomic data in Pantheria date to 2005,  
471 some former Orders which are no longer in use (e.g. Soricomorpha) appear in our data but are  
472 not expected to affect the results of analyses. Forty-eight species whose centroids occurred in  
473 water bodies were assigned to continents by manually inspecting species ranges. Widely-  
474 distributed domesticated animals, datasets with genus-level metadata from broadly-distributed  
475 genera, datasets from cell lines or with taxonomic information only at the Class level, and those  
476 which had no geographic range data available (mostly aquatic mammals) were searched by  
477 Serratus, but excluded from geographic comparisons. We quantified geographic and taxonomic  
478 biases in our dataset both in units of bases of RNA sequenced and number of species  
479 investigated.

480 Although most mammalian metagenomic and transcriptomic libraries were captured in  
481 the mammalian search, we also examined datasets from SRA search queries for vertebrates,  
482 metagenomes, and viromes to ensure that all relevant libraries were captured in our measures of  
483 search effort. For these datasets, we removed libraries with persistent errors and calculated  
484 search effort as bases of RNA sequenced across the three orders in which deltaviruses were

485 discovered, removing libraries named for specific viral taxa which may have been enriched for  
486 these taxa and therefore do not represent a likely source of novel viruses. As these libraries  
487 lacked species-level meta-data (hence their exclusion from the mammalian search above), we  
488 could not systematically calculate number of species in these datasets. Additional search queries  
489 are available at <https://github.com/ababaian/serratus/wiki/SRA-queries>.

## 490 **2. Phylogenetic analyses**

### 491 **a. Bayesian phylogeny using MrBayes**

492 Phylogenetic analysis was performed on complete DA<sub>g</sub> amino acid sequences to place  
493 mammalian deltaviruses relative to HDV and other described deltaviruses. Representative  
494 sequences from each clade of HDV and other previously published DVs were aligned with  
495 DrDVs (sequences generated by RT-PCR, described in Methods section 3b), PmacDV, OvirDV  
496 and MmonDV using the E-INS-i algorithm and JTT2000 scoring matrix of MAFFT within  
497 Geneious. Large delta antigen sequences from HDV were trimmed manually to small delta  
498 antigen length, and the alignment was further trimmed in trimal using the automated1 setting to a  
499 final length of 192aa. The best substitution model (JTTDCMut+F+G4) was determined using  
500 ModelFinder (21) within IQTree 2 (22). Bayesian phylogenetic analysis was performed using the  
501 most similar model available within MrBayes (JTT+F+G4). The analysis was run for 5,000,000  
502 generations and sampled every 2,500 generations, with the first 500 trees discarded as burn-in to  
503 generate the consensus tree.

### 504 **b. Bayesian phylogeny using StarBeast**

505 We used StarBeast to generate a species-level phylogeny for the co-phylogenetic analysis, using  
506 the same amino acid alignment of complete DA<sub>g</sub> which was used in the MrBayes analysis.  
507 StarBeast is typically used with multi-locus sequence data from multiple individuals per species  
508 but can also be applied to single gene alignments (23). Notably, a preliminary analysis suggested  
509 this approach was more conservative than a constant effective size coalescent model in BEAST  
510 which substantially inflated posterior probabilities on nodes across the tree relative to the  
511 MrBayes analysis (Fig. 2A). The StarBeast multi-species coalescent analysis was carried out as  
512 two duplicate runs of 50 million generations (sampling every 5000 generations) in BEAST2,  
513 using the JTT+G substitution model, the linear with constant root model for the species tree  
514 population size, and a Yule speciation model. Combined log files were assessed for convergence

515 and effective sample size values >200 using TRACER. Twenty percent of trees were discarded  
516 as burn-in prior to generating the consensus tree.

### 517 **c. Co-phylogeny**

518 Co-phylogenetic analyses were performed in R using PACo (24, 25) and ParaFit (26, 27).

519 Analyses were performed on three subsets of matched host-deltavirus data: all taxa, ingroup taxa  
520 (mammals, bird and snake) and mammals only. Host datasets consisted of distance matrices  
521 derived from a TimeTree phylogeny (timetree.org). For metagenomic libraries which contained  
522 individuals of multiple species (AvianDV and FishDV), one host was selected for inclusion  
523 (*Anas gracilis* and *Macroramphosus scolopax*, respectively). Host data were not available in  
524 TimeTree for two species in which deltaviruses were discovered (*Proechimys semispinosus* and  
525 *Schedorhinotermes intermedius*), so available congeners were substituted (*Proechimys guairae*  
526 and *Schedorhinotermes medioobscurus*, respectively). Virus datasets consisted of distances  
527 matrices from posterior species trees generated in StarBeast. Co-phylogeny analyses performed  
528 using virus distance matrices derived from posterior MrBayes trees, pruned to contain only  
529 relevant taxa, yielded qualitatively similar results. For both analyses, the principal coordinates  
530 analysis of distance matrices was performed with the ‘cailliez’ correction. Since units of branch  
531 length differed between host and virus trees, all distance matrices were normalized prior to co-  
532 evolutionary analyses. To account for phylogenetic uncertainty in the evolutionary history of  
533 deltaviruses, analyses were carried out using 1,000 trees randomly selected from the posterior  
534 distribution of the Bayesian phylogenetic analyses (separately for StarBeast and MrBayes). Due  
535 to uncertain placement of HDV3 in both phylogenies, one representative of HDV was randomly  
536 selected for each iteration. For each tree, we calculated summary statistics (see below) describing  
537 the dependence of the deltavirus phylogeny on the host phylogeny. *P*-values were estimated  
538 using 1,000 permutations of host-virus associations.

539 For PACo analyses, the null model selected was r0, which assumes that virus phylogeny  
540 tracks the host phylogeny. Levels of co-phylogenetic signal were evaluated as the median global  
541 sum of squared residuals ( $m_{2xy}$ ) and mean significance (*P*-values), averaged over the 1,000  
542 posterior trees. Empirical distributions were compared to null distributions for each dataset. For  
543 ParaFit analyses, the levels of co-phylogenetic signal in each dataset were evaluated as the  
544 median sum of squares of the fourth corner matrix (ParaFitGlobal) and mean significance (*P*-  
545 values), averaged over 1,000 posterior trees. ParaFit calculates the significance of the global

546 host-virus association statistic by randomly permuting hosts in the host-virus association matrix  
547 to create a null distribution. Since Parafit does not provide this distribution to users, we  
548 approximated it for visualization by manually re-estimating the global host-virus association  
549 statistic for 1,000 random permutations of hosts in the host-virus association matrix. Phylogenies  
550 and co-phylogenies were visualized in R using the packages ‘ape’ (27), ‘phangorn’ (28),  
551 ‘phytools’ (29), and ‘ggtree’ (30).

### 552 **3. Deltaviruses in Neotropical bats**

#### 553 **a. Capture and sampling of wild bats**

554 To examine DrDV prevalence in vampire bats, we studied 12 sites in three departments of Peru  
555 between 2016-2017 (Fig. 3A). Age and sex of bats were determined as described previously (2).  
556 Saliva samples were collected by allowing bats to chew on sterile cotton-tipped wooden swabs  
557 (Fisherbrand). Blood was collected from vampire bats only by lancing the propatagial vein and  
558 saturating a sterile cotton-tipped wooden swab with blood. Swabs were stored in 1 mL  
559 RNALater (Ambion) overnight at 4°C before being transferred to dry ice and stored in -70°C  
560 freezers.

561 Bat sampling protocols were approved by the Research Ethics Committee of the  
562 University of Glasgow School of Medical, Veterinary and Life Sciences (Ref081/15), the  
563 University of Georgia Animal Care and Use Committee (A2014 04-016-Y3-A5), and the  
564 Peruvian Government (RD-009-2015-SERFOR-DGGSPFFS, RD-264-2015-SERFOR-  
565 DGGSPFFS, RD-142-2015-SERFOR-DGGSPFFS, RD-054-2016-SERFOR-DGGSPFFS).

#### 566 **b. RT-PCR and sequencing of blood and saliva samples**

567 Primers were designed to screen bat saliva and blood samples for a conserved region of the DA<sub>g</sub>  
568 protein of DrDV-A (236bp) and DrDV-B (231bp), by hemi-nested and nested RT-PCR  
569 respectively (Table S4). Alternative primers were designed to amplify the complete DA<sub>g</sub> for  
570 DrDV-A (707bp) and DrDV-B (948bp) using a one-step RT-PCR (Table S4). cDNA was  
571 generated from total nucleic acid extracts using the Protoscript II First Strand cDNA synthesis kit  
572 with random hexamers; RNA and random hexamers were heated for 5 minutes at 65°C then  
573 placed on ice. Protoscript II reaction mix and Protoscript II enzyme mix were added to a final  
574 concentration of 1x, and the reaction was incubated at 25°C for 5 minutes, 42°C for 15 minutes,  
575 and 80°C for 5 minutes. PCR was performed using Q5 High-Fidelity DNA Polymerase (NEB).  
576 Each reaction contained 1x Q5 reaction buffer, 200 μM dNTPs, 0.5 μM each primer, 0.02 U/μL

577 Q5 High Fidelity DNA polymerase and either 2.5  $\mu$ L cDNA or 1  $\mu$ L Round 1 PCR product.  
578 Reactions were incubated at 98°C for 30 seconds, followed by 40 cycles of 98°C for 10 seconds,  
579 61-65°C for 30 seconds (or 58-60°C for 30 seconds for the complete DA<sub>g</sub>), 72°C for 40 seconds,  
580 and a final elongation step of 72°C for 2 minutes. PCR products of the correct size were  
581 confirmed by re-amplification from cDNA or total nucleic acid extracts and/or Sanger  
582 sequencing (Eurofins Genomics).

### 583 **c. Bat species confirmation**

584 We confirmed the morphological species assignment of the *C. perspicillata* individual in which  
585 DrDV-B was detected by sequencing cytochrome B. Cytochrome B was amplified from the same  
586 saliva sample in which DrDV-B was detected using primers Bat 05A and Bat 04A (31) and  
587 GoTaq Green Master Mix (Promega) according to the manufacturer's instructions, and the  
588 resulting product was Sanger sequenced (Eurofins Genomics) then evaluated by nucleotide blast  
589 against Genbank.

### 590 **d. Genetic diversity and distribution of DrDV-B**

591 To examine relationships among DrDV-B sequences, Bayesian phylogenetic analysis was  
592 performed on a 214bp fragment of the DA<sub>g</sub>. Sequences from saliva and blood of 41 *D. rotundus*  
593 and saliva from one *C. perspicillata* were aligned using MAFFT within Geneious. Duplicate  
594 sequences originating from the blood and saliva of the same individuals were removed.  
595 Alignments were trimmed using Trimal (32) with automated1 settings, and the best model of  
596 sequence evolution was determined using jModelTest2 (33). Phylogenetic analysis was  
597 performed using MrBayes 3.6.2 (34) with the GTR+I model. The analysis was run for 4,000,000  
598 generations and sampled every 2,000 generations, with the first 1,000 trees removed as burn-in.  
599 The association between phylogenetic relationships and location at both the regional and colony  
600 level was tested using BaTS (35) with 1,000 posterior trees and 1,000 replicates to generate the  
601 null distribution.

### 602 **e. Statistical analyses of DrDV-B**

603 We modeled the effects of age and sex on DrDV-B presence in saliva using a binomial  
604 generalized linear mixed model (GLMM) in the package lme4 (36) in R. Age (female/male) and  
605 sex (adult/subadult) were modeled as categorical variables, with site included as a random effect.  
606 We also evaluated differences in DrDV-B prevalence between regions of Peru using a binomial

607 generalized linear model (GLM), and used the *Anova* function of the *car* package (37) to  
608 calculate the likelihood ratio  $\chi^2$  test statistic.

#### 609 **4. Identifying candidate helper viruses for mammalian deltaviruses**

##### 610 **a. Hepadnavirus screening in vampire bats**

611 We tested samples for the presence of bat hepadnavirus as a candidate helper virus to DrDV.  
612 DNA from saliva and blood samples was screened for HBV-like viruses using pan-  
613 *Hepadnaviridae* primers (HBV-F248, HBV-R397, HBV-R450a, HBV-R450b; Table S4) and  
614 PCR protocols (38). We used a plasmid carrying a 1.3-mer genome of human HBV that is  
615 particle assembly defective but replication competent as a positive control.

##### 616 **b. Bioinformatic screening of published metagenomic datasets**

617 We performed comprehensive virus discovery using an in-house bioinformatic pipeline (2) on  
618 sequence datasets containing deltaviruses to identify candidate helper viruses. Datasets analyzed  
619 included all vampire bat datasets (22 from (2), 46 from (3)), *P. macrotis* datasets (SRR7910142,  
620 SRR7910143, SRR7910144), *O. virginianus* datasets (SRR4256025-SRR4256034), and *M.*  
621 *monax* datasets (SRR2136906, SRR2136907). Briefly, after quality trimming and filtering, reads  
622 were analyzed by blastx using DIAMOND (39) against a RefSeq database to remove bacterial  
623 and eukaryotic reads. Remaining reads were then *de novo* assembled using SPAdes (4) and  
624 resulting contigs were analyzed by blastx using DIAMOND against a non-redundant (NR)  
625 protein database (40). KronaTools (41) and MEGAN (42) were used to visualize and report  
626 taxonomic assignments.

627

## 628 **Supplementary Results**

### 629 **1. Evaluation of continent level geographic biases in Serratus data**

630 We sought to confirm that the sole detection of mammalian deltaviruses in the Americas in three  
631 different mammalian orders was unlikely to have arisen from sampling biases in the RNA  
632 sequence datasets that we analyzed. The main text illustrates geographic patterns at broad scales  
633 and shows that New World species were under-represented relative to Old World species,  
634 indicating that sampling biases were unlikely to explain the absence of deltaviruses from Old  
635 World species. However, we also examined biases at finer geographic and taxonomic scales,  
636 focusing on the mammalian SRA search query dataset for which there was species and continent  
637 level information. At the continent level, data volumes (in bases of RNA sequenced) declined

638 from Asia (6.35e13), Africa (2.89e13), South America (7.99e12), North America (4.93e12),  
639 Europe (4.86e12), to Australia (3.75e12) (Fig S7). This implies that Africa (the previously  
640 assumed origin of HDV) has more than double the data of the Americas combined. Similar  
641 patterns were evident within the deltavirus-infected mammalian orders. For Artiodactyla, North  
642 and South American datasets were ranked 3<sup>rd</sup> and 5<sup>th</sup> respectively among the 5 continents which  
643 had sequence data. Although there was less Artiodactyla data from Africa than North America,  
644 Asia (1<sup>st</sup>) and Europe (2<sup>nd</sup>) had 2 and 1.6-fold more data than the Americas combined. For bats,  
645 North and South American datasets were ranked 5<sup>th</sup> and 6<sup>th</sup> among the 6 continents with data,  
646 and Europe (1<sup>st</sup>) and Africa (2<sup>nd</sup>) had 2.5 and 1.2-fold more data than datasets combined across  
647 the Americas. For rodents, North America datasets were ranked 2<sup>nd</sup>, while South American  
648 datasets were ranked 5<sup>th</sup> out of the 5 continents with data, but Asia (1<sup>st</sup>) had 1.1-fold more data  
649 than the Americas combined and Africa had 3.6 times more data than South America.

650 We also examined potential biases in search effort by number of species sequenced per  
651 continent. There were equal or fewer species of Artiodactyla sequenced in North (N = 5) and  
652 South America (N=1) compared to Europe (N = 5), Asia (N = 8) and Africa (N = 14). Similarly,  
653 rodent species sampled from Old World continents (N = 48; Europe [N = 8], Africa [N = 14],  
654 and Asia [N = 26] ) outnumbered those in the New World (N = 33; North America [N = 21],  
655 South America [N = 12]. Neither Rodentia nor Artiodactyla datasets were searched from  
656 Australia. In contrast, there were more bat species in North and South American datasets (N = 4  
657 and 42, respectively) compared to Asia (N = 22), Africa (N = 5), Europe (N = 2), and Australia  
658 (N =1) leading to a slight bias toward New World bats (46 species vs 30 Old World species).  
659 Consequently, in the ‘mammalian’ dataset, New World bats were more numerous at the species  
660 level, but had fewer individuals tested per species and/or less sequencing depth per species.

661 We further examined datasets generated by related search queries (vertebrate, metagenome  
662 and virome) which included some libraries from mammals that were excluded from the  
663 ‘mammalian’ dataset (see Materials and Methods, Section 1e). The vertebrate dataset contained  
664 no matches to the three mammalian Orders of interest (Rodentia, Artiodactyla, Chiroptera). For  
665 Rodentia, the metagenome dataset contained 380 libraries (9.7e7 bases) identified as “mouse  
666 metagenome” and the virome dataset contained 171 libraries (1e11 bases) which were identified  
667 as “mouse gut metagenome” or “rodent metagenome” or “Rattus” or “rat gut metagenome”.  
668 These could not be assigned geographic provenance and likely represented laboratory animals.



669 For Artiodactyla, the virome dataset contained 317 libraries (1e11 bases) which were identified  
670 as “pig gut metagenome” or “pig metagenome” or “bovine gut metagenome”. As these libraries  
671 likely derived from either experimental or domestic animals, we conclude that additional data  
672 from these two Orders are unlikely to influence geographic or taxonomic bias. For Chiroptera,  
673 there were a total of 25 libraries (2.4e10 bases) identified as “bat metagenome”. The vast  
674 majority (N=24) were from Old World bats. Eleven derived from a study of bat rotaviruses  
675 (PRJNA562472) which of which 10 were collected from Old world locations (Ghana, Bulgaria)  
676 and one from New World (Costa Rica). Two libraries were bat viral metagenomes generated  
677 from samples collected in South Africa (SRR5889194; SRR5889129), and twelve libraries were  
678 generated from bats sampled in China (PRJNA379515). There were 14 bat species analyzed in  
679 all of these libraries, of which eight were not included in the mammalian SRA dataset, bringing  
680 the total number of Old World bat species to 38. Therefore, by the metric of number of species,  
681 New World bats remained slightly over-represented (38 versus 46 species) though as mentioned  
682 above, Old World bat derived datasets were sequenced more comprehensively and covered a  
683 larger number of continents.

684 Overall, across the three orders in which we detected deltaviruses, fewer species were studied  
685 in North and South American datasets (85 species) compared to those from Africa, Asia, Europe  
686 and Australia (105 species) and the total volume of RNA sequenced was 2.7 times greater for  
687 Old world species (1.64e13 bases RNA) than New world species (6.02e12). We therefore  
688 conclude that the exclusive presence of deltaviruses in American mammals is unlikely to  
689 represent geographic biases in our datasets.

## 690 **2. Large delta antigen in novel mammalian deltaviruses**

691 In HDV, the large delta antigen protein (L-HDAg) is produced by RNA editing of the UAG stop  
692 codon to include 19 additional aa (43) and contains a farnesylation site which interacts with  
693 HBV (44). The DrDV-B DAg from the genome from bat colony CAJ1 terminated in UAG,  
694 which if edited similarly to HDV would generate a putative L-DAg containing an additional 28  
695 aa (Fig. S3). In contrast, DrDV-B DAg from the two other bat colonies from which genomes  
696 were sequenced (LMA6 and AYA11), as well as DrDV-A DAg, terminated in a UAA stop  
697 codon so would not appear to be similarly edited, although it is possible to extend the open  
698 reading frames through frameshifting (9). Importantly, no putative vampire bat L-DAg generated

699 through either RNA editing or frameshifting contained a farnesylation site. PmacDV, OvirDV,  
700 and MmonDV also did not contain apparent L-DAG extensions or farnesylation sites (*I*).

### 701 **3. Co-phylogenetic results across posterior distributions of trees from two Bayesian** 702 **searches and two different co-phylogeny analyses**

703 Consensus topologies differed slightly between the phylogenetic analyses of deltaviruses using a  
704 multi-species coalescent model in StarBeast and a coalescent model in MrBayes, particularly in  
705 relation to the termite-associated deltavirus-like agent and avian deltavirus (compare Fig. 2A and  
706 2B). We therefore repeated our co-phylogenetic analysis using 1,000 trees from the MrBayes  
707 analysis to verify that our conclusions were robust to this topological inconsistency. Analyses  
708 performed using virus distance matrices derived from posterior MrBayes trees were congruent  
709 with those in StarBeast.

710 In the broadest analyses of all taxa, results differed slightly among co-phylogenetic  
711 analyses. Specifically, PACo analyses supported the dependence of the deltavirus phylogeny on  
712 the host phylogeny (StarBeast trees:  $m_{2xy} = 0.57$  (standard deviation = 0.48- 0.66);  $m_{2xy\_null} =$   
713  $1.27$  (1.11- 1.44);  $P = 0.01$ ; MrBayes trees: ( $m_{2xy} = 0.53$  (0.46- 0.6);  $m_{2xy\_null} = 1.26$  (1.1- 1.42);  $P$   
714  $= 0.002$ ). However, ParaFit analyses supported independence of the virus and host phylogenies  
715 based on both StarBeast trees (ParaFitGlobal = 0.72 (standard deviation = 0.59- 0.86);  $P = 0.09$ )  
716 and MrBayes trees (ParaFitGlobal = 0.63 (0.52- 0.75);  $P = 0.07$ ). Similarly, for ingroup taxa  
717 (mammalian, avian and snake deltaviruses), PACo detected evidence of co-phylogeny using both  
718 sets of trees (Starbeast:  $m_{2xy} = 0.81$  (0.66- 0.96);  $m_{2xy\_null} = 1.3$  (1.14- 1.46);  $P = 0.02$ ; MrBayes:  
719  $m_{2xy} = 0.76$  (0.69- 0.83);  $m_{2xy\_null} = 1.28$  (1.1- 1.46);  $P = 0.01$ ), while ParaFit analyses with  
720 StarBeast trees (ParaFitGlobal = 0.8 (0.7- 0.89);  $P = 0.12$ ) and MrBayes trees (ParaFitGlobal =  
721  $0.68$  (0.62- 0.75);  $P = 0.09$ ) found no significant support for co-phylogeny.

722 All analyses of mammalian deltaviruses failed to reject the null hypothesis of independence  
723 of phylogenies. These results were consistent when with both StarBeast and MrBayes trees in  
724 PACo (StarBeast:  $m_{2xy} = 1.51$  (1.36- 1.65);  $m_{2xy\_null} = 1.66$  (1.43- 1.9);  $P = 0.28$ ; MrBayes:  $m_{2xy}$   
725  $= 1.16$  (1.07- 1.25);  $m_{2xy\_null} = 1.22$  (0.97- 1.48);  $P = 0.35$ ), as well as in ParaFit (StarBeast:  
726 ParaFitGlobal = 0.61 (0.55- 0.68);  $P = 0.52$ ; MrBayes: ParaFitGlobal = 0.49 (0.44- 0.54);  $P =$   
727  $0.5$ ).

728 In summary, both PACo and ParaFit analyses of StarBeast and MrBayes trees showed no  
729 support for co-phylogeny in the mammalian dataset. Including more divergent host-virus pairs

730 increased support for co-phylogeny in the all taxa and ingroup datasets, with these results being  
731 statistically significant in PACo analyses but not in ParaFit analyses. Inconsistent support for  
732 phylogenetic independence at broader scales may reflect variation in the sensitivity of different  
733 analyses to detect phylogenetic congruence which occurs in only a subset of branches. For  
734 example, the non-ingroup deltavirus-like agents formed a polytomy of long branches and were  
735 found in the most divergent hosts from mammals, which may have inflated co-phylogenetic  
736 signal (Fig. S5). Regardless, given the consistent evidence against a co-speciation model among  
737 mammals and incongruences observed among other taxa in the consensus topologies, these  
738 findings illustrate that a model of co-speciation alone cannot explain the evolutionary  
739 relationships of deltaviruses and their hosts.

#### 740 **4. Putative cross-species transmission of DrDV-B to a frugivorous bat.**

741 The detection of a vampire bat associated deltavirus in a frugivorous bat (*Carollia perspicillata*)  
742 is strongly suggestive of cross-species transmission but might also arise through mis-assignment  
743 of bat species in the field or contamination of samples during laboratory processing. To exclude  
744 the possibility of host species mis-identification, we confirmed morphological species  
745 assignment by sequencing Cytochrome B from the same saliva sample in which we amplified  
746 deltavirus (see Methods), which showed 99.49% identity with a published *C. perspicillata*  
747 sequence in Genbank (Accession AF511977.1). Laboratory contamination was minimized by  
748 processing all samples through a dedicated PCR pipeline with a one directional workflow. PCR  
749 reagents are stored and master mixes prepared in a laboratory that is DNA/RNA free, and which  
750 cannot be entered after going into any other lab. Field collected samples from bats are extracted  
751 and handled in a room strictly used for clinical samples which cannot be entered after going in  
752 any other lab aside from the master mix room. To further exclude laboratory contamination, we  
753 independently amplified the *C. perspicillata* deltavirus product from two separate batches of  
754 cDNA. We used only round 1 primers of a nested PCR to avoid detecting trace amounts of  
755 potential contamination; in vampire bats only 68% of individuals deemed positive after round 2  
756 were also positive in round 1. Furthermore, in the laboratory, samples from other bat species  
757 were handled separately from samples collected from vampire bats, with extractions and PCRs  
758 being performed on different days. As discussed in the main text, the absence of genetic  
759 divergence from sympatric strains in *D. rotundus* indicates limited or no onward transmission of  
760 DrDV-B in *C. perspicillata*. Whether the *C. perspicillata* sustained an actively replicating

761 infection is uncertain, although detection in a single round of PCR (which was true for only 68%  
762 of DrDV-positive vampire bats) implies an intensity of infection which could suggest DrDV  
763 replication in the recipient host, though this would require further testing to confirm. Definitively  
764 resolving the extent of DrDV-B replication could be achieved using a quantitative RT-PCR  
765 targeting the DrDV antigenome. Such assays do not currently exist and after the confirmatory  
766 testing above, in addition to metagenomic sequencing, we unfortunately would no longer have  
767 sufficient RNA available from the *C. perspicillata* bat to run such a test if it were available. In  
768 summary, we are confident that the individual in which the deltavirus was detected is a *C.*  
769 *perspicillata* and we believe the most likely explanation to be cross-species transmission in  
770 nature, though whether this represents an active infection remains uncertain.

#### 771 **5. Candidate helper viruses of OvirDV and MmonDV**

772 We also examined viral communities in *O. virginianus* and *M. monax* libraries for candidate  
773 helpers. Given that MmonDV was detected in animals experimentally inoculated with  
774 Woodchuck Hepatitis Virus (WHV, a Hepadnavirus), these libraries were unsurprisingly  
775 dominated by WHV, but also contained reads matching to Herpesviridae, Flaviviridae,  
776 Poxviridae and Retroviridae (Figure S8). *O. virginianus* libraries contained Poxviridae,  
777 Retroviridae, and Herpesviridae reads. Consequently, reads matching to Poxviridae were  
778 detected in libraries for all deltavirus hosts which were studied here (DrDV-A, DrDV-B,  
779 PmacDV, MmonDV, OvirDV), although reads were less abundant than other viral taxa and  
780 could not always be decisively ruled out as false positives. Although there is no experimental  
781 evidence that Poxviruses can produce infectious deltavirus particles, this ecological association  
782 may be worth considering in future studies of mammalian deltaviruses.

783 **Supplementary Figures**

784

|                    | U81989 | AB118846 | AB118845 | AM183326 | AM183329 | AM183333 | AM183327 | AB037948 | OvirDV | MmonDV | DrDV-A | PmacDV | MKS98009 | DrDV-B | NC_040729 | NC_040845 | MN031240 | MN031239 | MK962760 | MK962759 |
|--------------------|--------|----------|----------|----------|----------|----------|----------|----------|--------|--------|--------|--------|----------|--------|-----------|-----------|----------|----------|----------|----------|
| U81989_HDV1        |        | 73.5     | 72.3     | 69.6     | 68.3     | 68.9     | 71.2     | 60.4     | 57.8   | 51.5   | 53     | 46.8   | 46.8     | 47.5   | 41.8      | 37.2      | 31.9     | 30.7     | 28.1     | 30.1     |
| AB118846_HDV2      | 73     |          | 76       | 74.7     | 74.1     | 71.5     | 72.5     | 62.5     | 58.7   | 52.6   | 54.5   | 47.5   | 47.4     | 48.2   | 42        | 37.5      | 33.2     | 31.7     | 28.5     | 30.2     |
| AB118845_HDV4      | 74.4   | 75.7     |          | 74.3     | 72.6     | 71.5     | 72.9     | 63.1     | 61.5   | 53.4   | 56.1   | 48     | 48       | 49     | 41.8      | 37.4      | 32.9     | 30.4     | 27.8     | 29.9     |
| AM183326_HDV5      | 70.9   | 77.1     | 75.3     |          | 74.7     | 72.6     | 72.1     | 61       | 58.6   | 51.2   | 55.1   | 47.8   | 47.8     | 48     | 42.4      | 37.8      | 32.2     | 31.5     | 28.3     | 30.7     |
| AM183329_HDV6      | 69.3   | 72       | 69.6     | 76.3     |          | 71.9     | 72.3     | 62.4     | 59.2   | 52.8   | 54.5   | 47.9   | 47.8     | 48.1   | 41.8      | 35.7      | 32.1     | 31.4     | 27.7     | 31.2     |
| AM183333_HDV7      | 68     | 72.6     | 70.2     | 77.3     | 72.6     |          | 75.4     | 60.9     | 58.7   | 51.1   | 52.1   | 46.9   | 46.9     | 47.3   | 42.8      | 36.3      | 31.2     | 31       | 27.9     | 30.1     |
| AM183327_HDV8      | 68.9   | 72.4     | 75.7     | 79.9     | 75.8     | 75.4     |          | 61.5     | 58.9   | 52.2   | 53.6   | 47.6   | 46.9     | 47.5   | 42.1      | 35.7      | 31.1     | 31.1     | 26.3     | 30.4     |
| AB037948_HDV3      | 66.8   | 63.2     | 66.1     | 65.7     | 64.6     | 63.3     | 64.7     |          | 55     | 50.6   | 52     | 46.5   | 46.1     | 46.7   | 41.4      | 35.7      | 30.1     | 29.8     | 26.7     | 30.1     |
| OvirDV             | 61     | 64.1     | 69.1     | 65.1     | 66.1     | 62.7     | 65.6     | 63       |        | 55.8   | 61.6   | 47     | 47.4     | 47.1   | 42.7      | 35.8      | 31.2     | 31.1     | 25.7     | 28.2     |
| MmonDV             | 55.4   | 57.4     | 60.3     | 56.4     | 54.7     | 54.5     | 54.9     | 59.4     | 67     |        | 56.9   | 45.8   | 46.2     | 45.9   | 43.5      | 33.7      | 28.5     | 29.4     | 23.4     | 27.4     |
| DrDV-A             | 62.6   | 63.6     | 64.4     | 62.6     | 61.4     | 60.1     | 60.5     | 60.4     | 74.7   | 70.1   |        | 47     | 47.4     | 47.6   | 43.3      | 36.3      | 29       | 28.5     | 24.4     | 27.5     |
| PmacDV             | 54.3   | 53.8     | 55.6     | 52.3     | 52.6     | 52.9     | 54.3     | 53.7     | 57.7   | 55.1   | 56.1   |        | 95.4     | 71.2   | 44.4      | 33.7      | 29       | 30       | 24.7     | 26.2     |
| MKS98009_PsemDV    | 54.8   | 53.8     | 56.1     | 52.8     | 54.2     | 53.4     | 54.8     | 54.7     | 58.2   | 55.1   | 56.1   | 96.9   |          | 72.6   | 43.8      | 33.7      | 29.4     | 30.1     | 24.2     | 26.3     |
| DrDV-B_CAJ1        | 52.8   | 51.8     | 53.1     | 51.8     | 51.6     | 49.9     | 52.3     | 54.2     | 56.1   | 55.1   | 56.7   | 79.6   | 81.1     |        | 43.7      | 34.5      | 29.7     | 29.6     | 24.7     | 27.3     |
| NC_040729_SnakeDV  | 50     | 47.2     | 47.7     | 46.2     | 47.8     | 45.9     | 45.2     | 47.8     | 50.8   | 50.3   | 51.8   | 53     | 54.5     | 53     |           | 34.2      | 28.7     | 27.1     | 23.2     | 26.2     |
| NC_040845_AvianDV  | 40.7   | 36.2     | 39.4     | 36.7     | 35.7     | 37.9     | 36.2     | 38.9     | 37.2   | 39.9   | 38.3   | 34.7   | 35.3     | 37.9   | 34.9      |           | 25.7     | 30.4     | 24.9     | 25.4     |
| MN031240_FishDV    | 19.8   | 18.9     | 20.9     | 19.9     | 20.4     | 18.5     | 20.4     | 19.9     | 23.4   | 22.5   | 20.9   | 19.3   | 19.3     | 21.3   | 17.1      | 16.1      |          | 24.5     | 22.1     | 24.4     |
| MN031239_NewtDV    | 21.8   | 20.6     | 19.7     | 20.6     | 18.9     | 19       | 20.2     | 20.2     | 19.6   | 18.8   | 20.1   | 16.9   | 17.3     | 17.8   | 16.7      | 21.1      | 14.7     |          | 22.9     | 24.3     |
| MK962760_ToadDV    | 20.7   | 24.6     | 20.9     | 20.9     | 20.4     | 21       | 19.3     | 19.9     | 18.2   | 20.4   | 20.9   | 20.2   | 20.2     | 18.6   | 18.4      | 20.1      | 16.8     | 16.2     |          | 19.8     |
| MK962759_TermiteDV | 20     | 18.2     | 20.1     | 21.6     | 19.7     | 22.2     | 21.1     | 21.1     | 20.1   | 19.7   | 21.6   | 19     | 21       | 20.5   | 18.8      | 21.5      | 10.8     | 14.9     | 10.4     |          |

785

786

787 **Fig. S1.** Genetic distances matrices showing representative deltavirus sequences with percent  
 788 nucleotide identities between genomes (upper triangle) and percent amino acid identities between  
 789 complete DAg sequences (lower triangle). Darker shading indicates higher percentage identity  
 790 between two deltaviruses

791

792

793

794

795

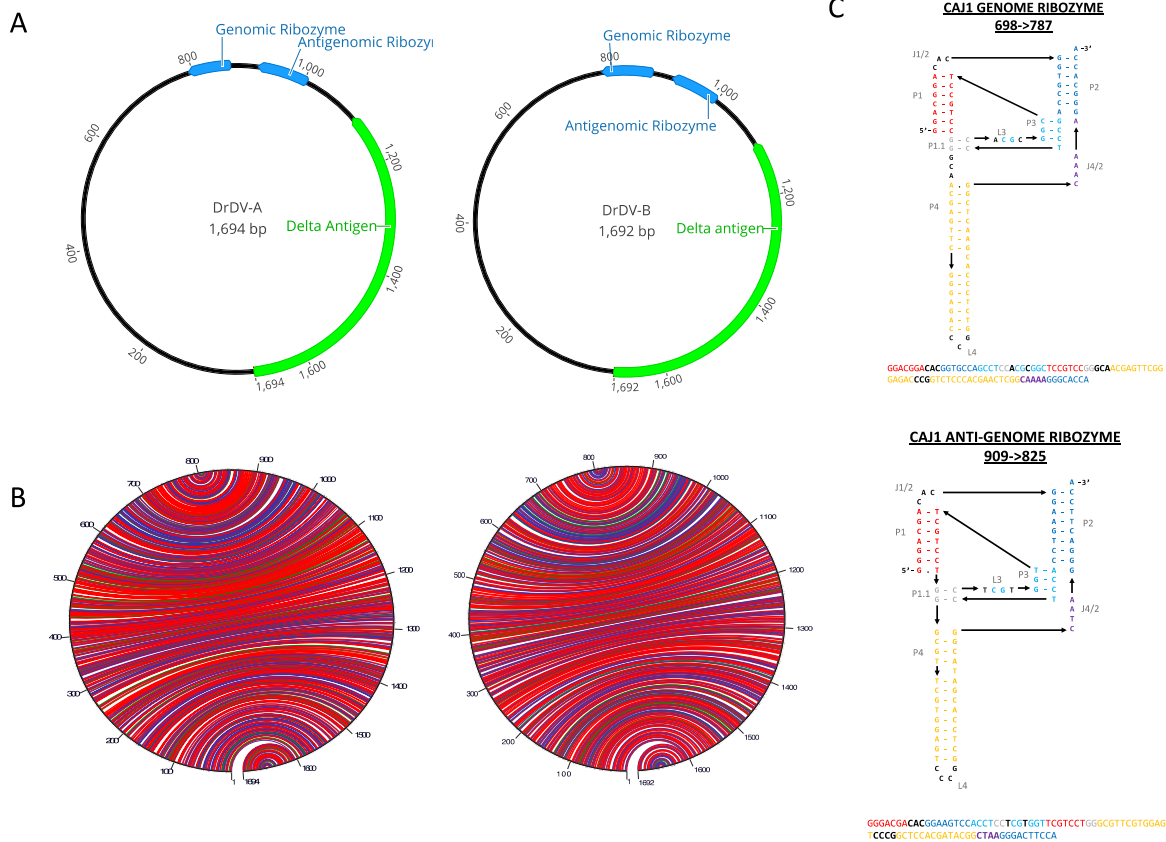

796

797 **Fig. S2. DrDV genomes exhibit characteristics common to deltaviruses.** (A) The locations of  
 798 the delta antigen open reading frame (green) and genomic/antigenomic ribozymes (blue) are  
 799 shown along the circular genomes of DrDV-A and DrDV-B (CAJ1 shown as an example). (B)  
 800 Intramolecular base pairing for DrDVs depicted as lines connecting points on the circular genome  
 801 – G-C pairs are red, A-U pairs are blue, G-U pairs are green, other pairs are yellow. (C) Genomic  
 802 and antigenomic ribozyme secondary structures are shown along with genome location for genome  
 803 CAJ1. Complementary regions are shown in the same color, and structures are depicted in the style  
 804 of Webb & Luptak to facilitate comparison with ribozymes from previous studies (9, 10, 45).

805

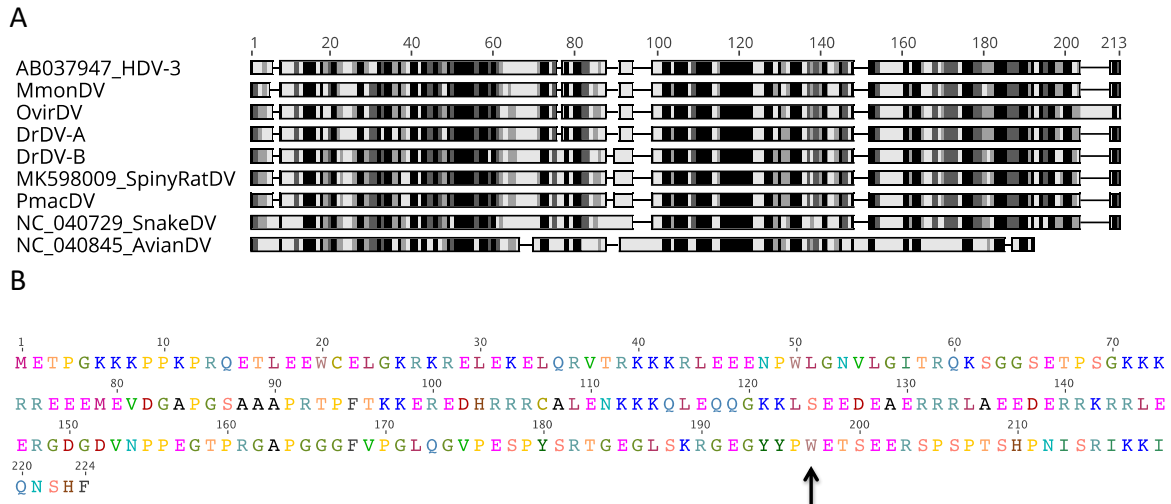

806

807 **Fig. S3. Characterization of DrDV delta antigen proteins.** (A) Alignment of delta antigen  
808 protein sequences for mammalian, snake and avian deltaviruses. Shading indicates level of  
809 similarity across all sequences, with regions of highest identity in black. (B) Putative sequence of  
810 the large DAg for the DrDV-B virus from the site CAJ1. The RNA editing site is marked with a  
811 black arrow; UAG has been edited to UGG yielding a tryptophan residue (W).

812

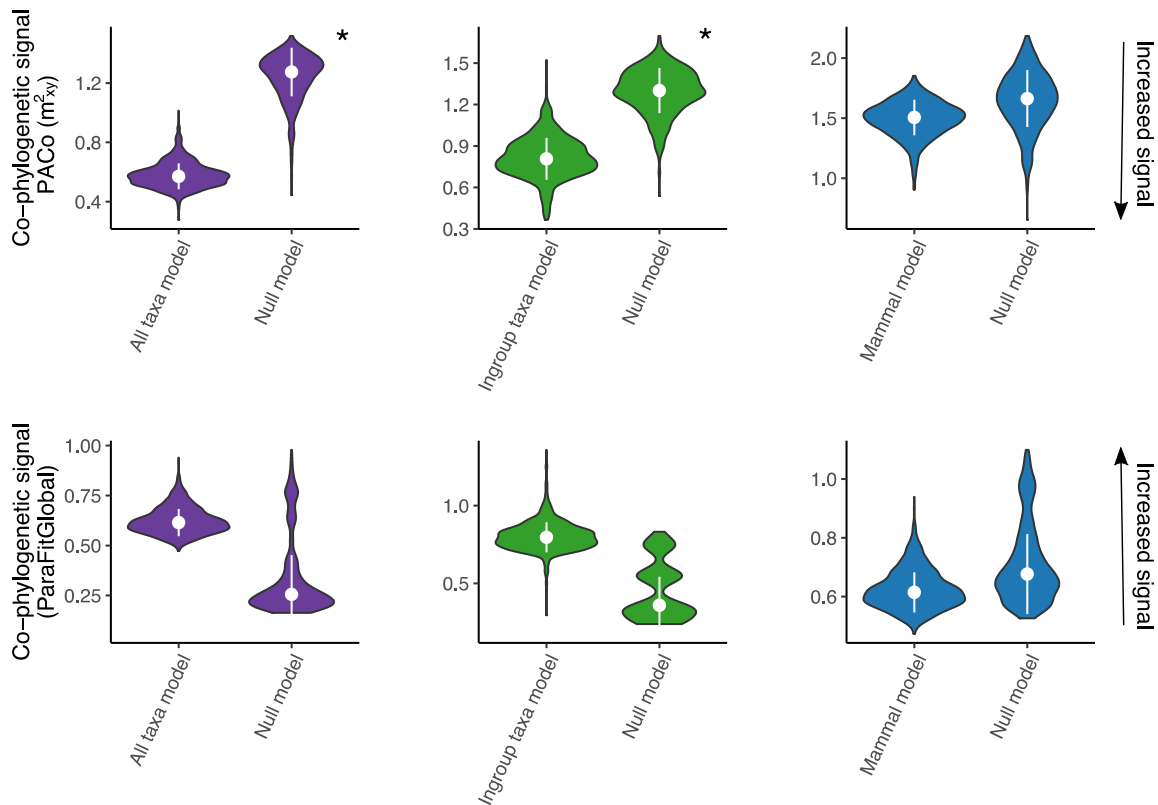

813 **Fig. S4. Co-phylogenetic signal in subsets of the deltavirus phylogeny.** Violin plots show the  
814 degree of dependence of 1,000 phylogenies from the posterior of the StarBeast analysis (Fig. S5)  
815 on the host phylogeny relative to null models, with the median and standard deviation. Data subsets  
816 are colored as in Fig. 2B (All taxa: purple+green+blue, Ingroup: green+blue, mammals: blue)  
817 Distributions are shown for analyses performed using PACo (top row) and ParaFit (bottom row).  
818 Asterisks show significant dependence of the virus phylogeny on the host phylogeny ( $P < 0.05$ ).  
819 Note that lower values of the empirical model relative to the null model represent increased signal  
820 of co-phylogeny in PACo while higher values represent increased signal of co-phylogeny in  
821 ParaFit.

822



823

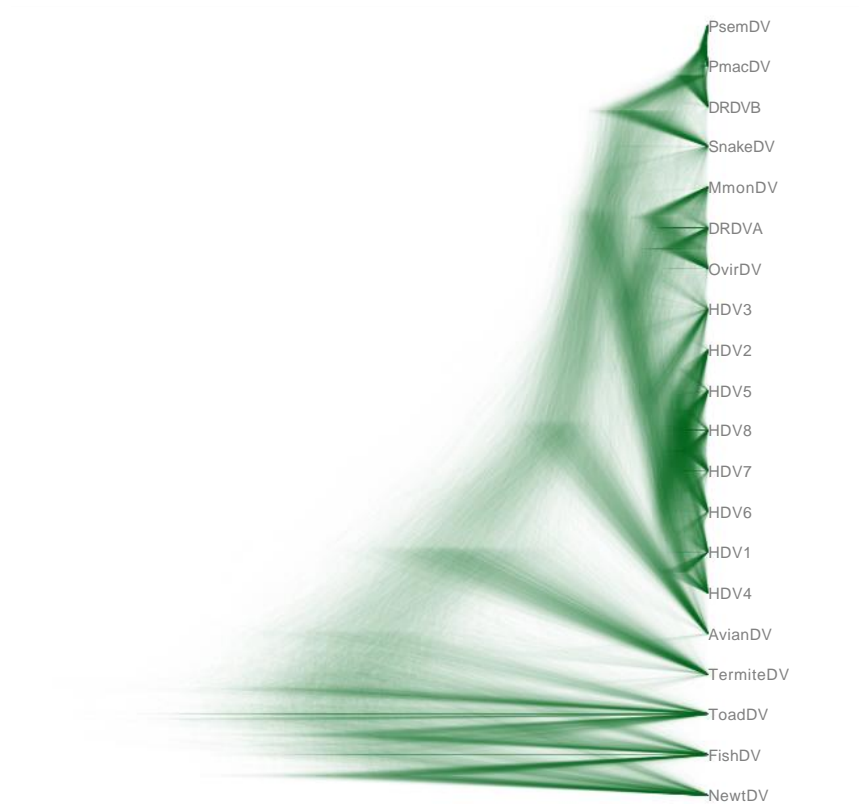

824

825 **Fig. S5. Uncertainty of deep relationships in the deltavirus phylogeny.** The DensiTree shows  
826 the distribution of 1,000 posterior trees from the StarBeast analysis, highlighting uncertainties in  
827 the evolutionary relationships among divergent deltavirus-like taxa.

828

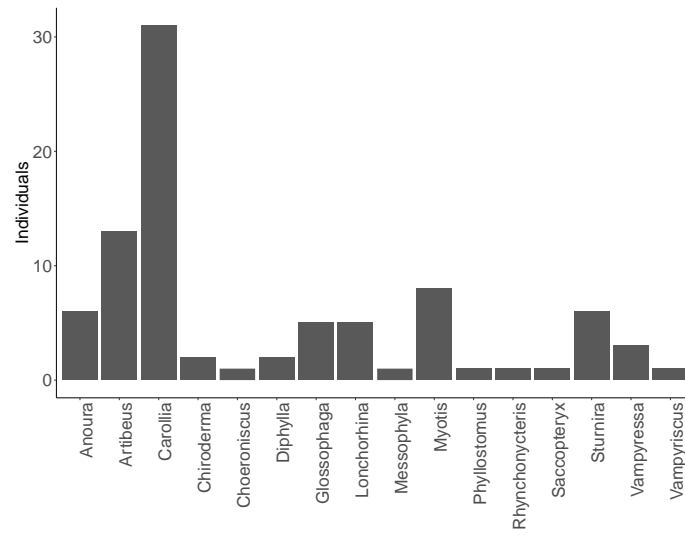

829

830 **Fig. S6. Counts of non-*D. rotundus* bat species saliva swabs individually screened by RT-**  
831 **PCR for DrDV-B. Bars group bats by genus.**

832

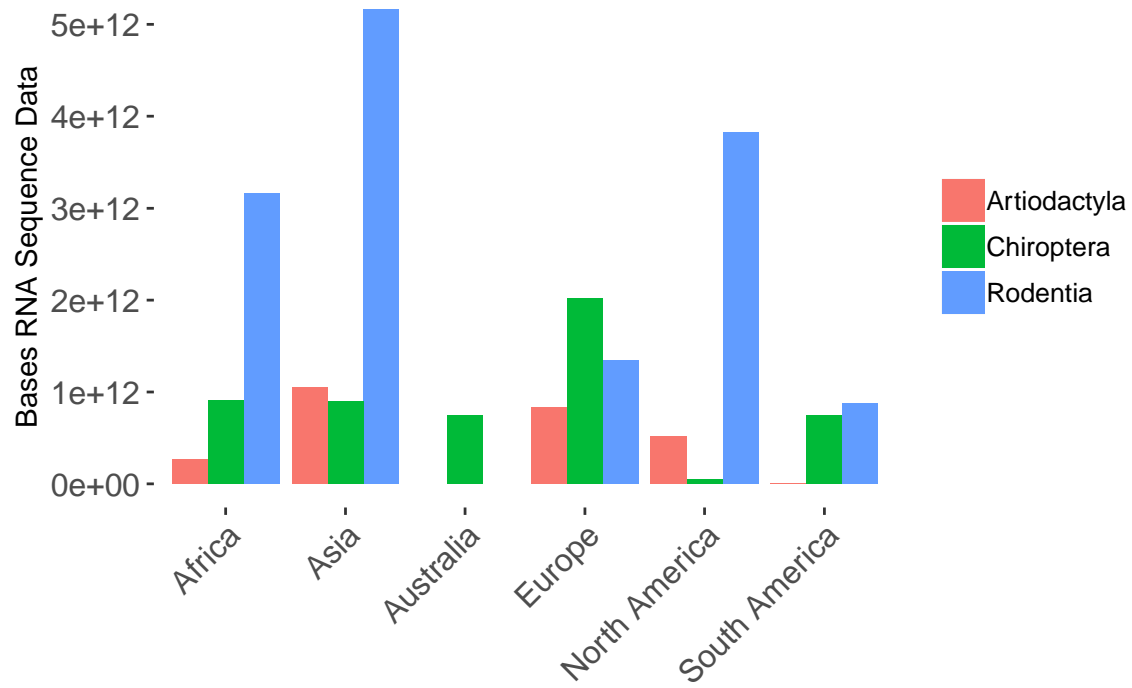

833

834 **Fig S7. Continent level geographic biases in RNA sequence data examined by Serratus.** Bars  
835 are colored by mammalian order; data shown are limited to the three orders in which deltaviruses  
836 were detected.

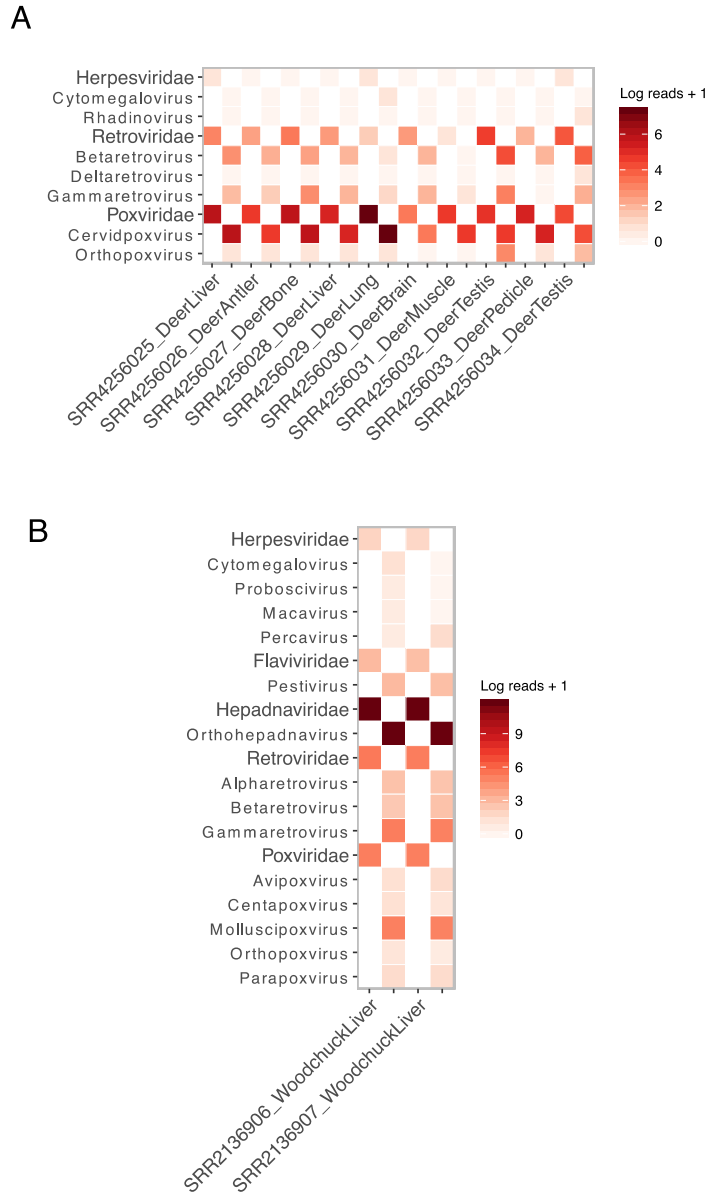

837

838 **Fig S8. Candidate helper viruses for the OvirDV and MmonDV datasets.** Mammal-infecting  
 839 viral communities are shown for (A) *O. virginianus* libraries sequenced by RNASeq from (17),  
 840 several of which contained OvirDV and (B) two *M. monax* samples infected with MmonDV from  
 841 (18). Viral families (in larger font) and genera are shown in adjacent columns for each sample,  
 842 with families on the left and genera on the right.

843

844

845 **Supplementary Tables**

846 **Table S1. Pooled bat saliva samples from Peru analyzed by metagenomic sequencing.**

| Genus               | Species                      | Individuals<br>in pool | Raw reads  | Deltavirus contig<br>length (bp) |
|---------------------|------------------------------|------------------------|------------|----------------------------------|
| <i>Carollia</i>     | <i>perspicillata</i>         | 10*                    | 28,700,978 | N                                |
| <i>Glossophaga</i>  | <i>soricina</i>              | 5                      | 24,079,752 | N                                |
| <i>Desmodus</i>     | <i>rotundus</i>              | 10                     | 28,946,275 | 921†                             |
| <i>Diphylla</i>     | <i>ecaadata</i>              | 2                      | 25,023,095 | N                                |
| <i>Anoura</i>       | <i>geoffroyi</i>             | 6                      | 18,569,505 | N                                |
|                     | <i>peruana</i>               |                        |            |                                  |
| <i>Artibeus</i>     | <i>lituratus</i>             | 10                     | 14,966,399 | N                                |
|                     | <i>obscurus</i>              |                        |            |                                  |
|                     | <i>planirostris</i>          |                        |            |                                  |
|                     | <i>fraterculus</i>           |                        |            |                                  |
| <i>Myotis</i>       | <i>oxyotus</i>               | 8                      | 19,934,479 | N                                |
|                     | <i>unidentified sp</i>       |                        |            |                                  |
| <i>Sturnira</i>     | <i>erythromos</i>            | 6                      | 11,348,995 | N                                |
|                     | <i>unidentified sp</i>       |                        |            |                                  |
| <i>Vampyressa/</i>  | <i>bidens</i>                | 4                      | 13,734,389 | N                                |
| <i>Vampyriscus</i>  | <i>unidentified sp</i>       |                        |            |                                  |
| <i>Rare species</i> | <i>Chiroderma trinitatum</i> | 8                      | 16,746,795 | N                                |
|                     | <i>Chiroderma salvini</i>    |                        |            |                                  |
|                     | <i>Choeroniscus minor</i>    |                        |            |                                  |
|                     | <i>Rhynchonycteris naso</i>  |                        |            |                                  |
|                     | <i>Saccopteryx bilineata</i> |                        |            |                                  |
|                     | <i>Messophyla macconelli</i> |                        |            |                                  |
|                     | <i>Phyllostomus discolor</i> |                        |            |                                  |
|                     | <i>Rhinophylla pumilio</i>   |                        |            |                                  |

847

848 \*Pool included individual CP-1 in which DrDV-B was detected by RT-PCR

849 †Pool was identical to CAJ1 pool where DrDV was initially discovered, confirming the ability to detect

850 deltaviruses when they are known to be present

851 **Table S2. Deltavirus positive cohorts evaluated by mapping reads from related libraries to**  
 852 **novel deltavirus genomes.**

| SRA accession              | Pool ID     | Hosts§                   | DV Reads¶                   |
|----------------------------|-------------|--------------------------|-----------------------------|
| <a href="#">ERR2756783</a> | AAC_H_F     | <i>Desmodus rotundus</i> | 2 (DrDV-A)                  |
| <a href="#">ERR2756784</a> | AAC_H_SV*   | <i>Desmodus rotundus</i> | 189 (DrDV-A)<br>18 (DrDV-B) |
| <a href="#">ERR2756785</a> | AAC_L_F     | <i>Desmodus rotundus</i> | 0                           |
| <a href="#">ERR2756786</a> | AAC_L_SV    | <i>Desmodus rotundus</i> | 0                           |
| <a href="#">ERR2756787</a> | AMA_L_F_NR  | <i>Desmodus rotundus</i> | 0                           |
| <a href="#">ERR2756788</a> | AMA_L_F_R   | <i>Desmodus rotundus</i> | 0                           |
| <a href="#">ERR2756789</a> | AMA_L_SV    | <i>Desmodus rotundus</i> | 0                           |
| <a href="#">ERR2756790</a> | CAJ_L_F_NR  | <i>Desmodus rotundus</i> | 0                           |
| <a href="#">ERR2756791</a> | CAJ_L_F_R   | <i>Desmodus rotundus</i> | 0                           |
| <a href="#">ERR2756792</a> | CAJ_L_SV    | <i>Desmodus rotundus</i> | 4                           |
| <a href="#">ERR2756793</a> | CAJ_H_F_1   | <i>Desmodus rotundus</i> | 0                           |
| <a href="#">ERR2756794</a> | CAJ_H_F_2   | <i>Desmodus rotundus</i> | 4                           |
| <a href="#">ERR2756795</a> | CAJ_H_SV*   | <i>Desmodus rotundus</i> | 169                         |
| <a href="#">ERR2756796</a> | HUA_H_F     | <i>Desmodus rotundus</i> | 2                           |
| <a href="#">ERR2756797</a> | HUA_H_SV    | <i>Desmodus rotundus</i> | 0                           |
| <a href="#">ERR2756798</a> | LMA_L_F_NR  | <i>Desmodus rotundus</i> | 0                           |
| <a href="#">ERR2756799</a> | LMA_L_F_R   | <i>Desmodus rotundus</i> | 0                           |
| <a href="#">ERR2756800</a> | LMA_L_SV_NR | <i>Desmodus rotundus</i> | 45                          |
| <a href="#">ERR2756801</a> | LMA_L_SV_R* | <i>Desmodus rotundus</i> | 320                         |
| <a href="#">ERR2756802</a> | LR_L_F_NR   | <i>Desmodus rotundus</i> | 0                           |
| <a href="#">ERR2756803</a> | LR_L_F_R    | <i>Desmodus rotundus</i> | 0                           |
| <a href="#">ERR2756804</a> | LR_L_SV     | <i>Desmodus rotundus</i> | 0                           |
| <a href="#">ERR3569452</a> | AMA2_H      | <i>Desmodus rotundus</i> | 0                           |
| <a href="#">ERR3569453</a> | AMA2_SV     | <i>Desmodus rotundus</i> | 0                           |
| <a href="#">ERR3569454</a> | API1_H      | <i>Desmodus rotundus</i> | 0                           |
| <a href="#">ERR3569455</a> | API1_SV     | <i>Desmodus rotundus</i> | 0                           |
| <a href="#">ERR3569456</a> | API17_H     | <i>Desmodus rotundus</i> | 0                           |
| <a href="#">ERR3569457</a> | API17_SV    | <i>Desmodus rotundus</i> | 2 (DrDV-A)                  |
| <a href="#">ERR3569458</a> | API140_H    | <i>Desmodus rotundus</i> | 32                          |

---

|                            |           |                          |                            |
|----------------------------|-----------|--------------------------|----------------------------|
| <a href="#">ERR3569459</a> | API140_SV | <i>Desmodus rotundus</i> | 0                          |
| <a href="#">ERR3569460</a> | API141_H  | <i>Desmodus rotundus</i> | 0                          |
| <a href="#">ERR3569461</a> | API141_SV | <i>Desmodus rotundus</i> | 0                          |
| <a href="#">ERR3569462</a> | AYA1_H    | <i>Desmodus rotundus</i> | 2                          |
| <a href="#">ERR3569463</a> | AYA1_SV   | <i>Desmodus rotundus</i> | 0                          |
| <a href="#">ERR3569464</a> | AYA7_H    | <i>Desmodus rotundus</i> | 0                          |
| <a href="#">ERR3569465</a> | AYA7_SV   | <i>Desmodus rotundus</i> | 18                         |
| <a href="#">ERR3569466</a> | AYA11_H   | <i>Desmodus rotundus</i> | 0                          |
| <a href="#">ERR3569467</a> | AYA11_SV* | <i>Desmodus rotundus</i> | 591                        |
| <a href="#">ERR3569468</a> | AYA12_H   | <i>Desmodus rotundus</i> | 0                          |
| <a href="#">ERR3569469</a> | AYA12_SV  | <i>Desmodus rotundus</i> | 2                          |
| <a href="#">ERR3569470</a> | AYA14_H   | <i>Desmodus rotundus</i> | 0                          |
| <a href="#">ERR3569471</a> | AYA14_SV* | <i>Desmodus rotundus</i> | 228 (DrDV-A)<br>2 (DrDV-B) |
| <a href="#">ERR3569472</a> | AYA15_H   | <i>Desmodus rotundus</i> | 0                          |
| <a href="#">ERR3569473</a> | AYA15_SV  | <i>Desmodus rotundus</i> | 0                          |
| <a href="#">ERR3569474</a> | CAJ1_H    | <i>Desmodus rotundus</i> | 0                          |
| <a href="#">ERR3569475</a> | CAJ1_SV*  | <i>Desmodus rotundus</i> | 172                        |
| <a href="#">ERR3569476</a> | CAJ2_H    | <i>Desmodus rotundus</i> | 4                          |
| <a href="#">ERR3569477</a> | CAJ2_SV†  | <i>Desmodus rotundus</i> | 0                          |
| <a href="#">ERR3569478</a> | CAJ4_H    | <i>Desmodus rotundus</i> | 0                          |
| <a href="#">ERR3569479</a> | CAJ4_SV†  | <i>Desmodus rotundus</i> | 0                          |
| <a href="#">ERR3569480</a> | CUS8_H    | <i>Desmodus rotundus</i> | 0                          |
| <a href="#">ERR3569481</a> | CUS8_SV   | <i>Desmodus rotundus</i> | 4                          |
| <a href="#">ERR3569482</a> | HUA1_H    | <i>Desmodus rotundus</i> | 0                          |
| <a href="#">ERR3569483</a> | HUA1_SV   | <i>Desmodus rotundus</i> | 0                          |
| <a href="#">ERR3569484</a> | HUA2_H    | <i>Desmodus rotundus</i> | 5                          |
| <a href="#">ERR3569485</a> | HUA2_SV   | <i>Desmodus rotundus</i> | 0                          |
| <a href="#">ERR3569486</a> | HUA3_H    | <i>Desmodus rotundus</i> | 0                          |
| <a href="#">ERR3569487</a> | HUA3_SV   | <i>Desmodus rotundus</i> | 0                          |
| <a href="#">ERR3569488</a> | HUA4_H    | <i>Desmodus rotundus</i> | 0                          |
| <a href="#">ERR3569489</a> | HUA4_SV   | <i>Desmodus rotundus</i> | 0                          |
| <a href="#">ERR3569490</a> | LMA5_H    | <i>Desmodus rotundus</i> | 0                          |
| <a href="#">ERR3569491</a> | LMA5_SV   | <i>Desmodus rotundus</i> | 8                          |

---

|                            |                    |                                 |      |
|----------------------------|--------------------|---------------------------------|------|
| <a href="#">ERR3569492</a> | LMA6_H             | <i>Desmodus rotundus</i>        | 0    |
| <a href="#">ERR3569493</a> | LMA6_SV*           | <i>Desmodus rotundus</i>        | 173  |
| <a href="#">ERR3569494</a> | LR2_H              | <i>Desmodus rotundus</i>        | 0    |
| <a href="#">ERR3569495</a> | LR2_SV             | <i>Desmodus rotundus</i>        | 0    |
| <a href="#">ERR3569496</a> | LR3_H              | <i>Desmodus rotundus</i>        | 0    |
| <a href="#">ERR3569497</a> | LR3_SV             | <i>Desmodus rotundus</i>        | 0    |
| <a href="#">SRR7910142</a> | Pm_03              | <i>Peropteryx macrotis</i>      | 0    |
| <a href="#">SRR7910143</a> | Pm_01*             | <i>Peropteryx macrotis</i>      | 346  |
| <a href="#">SRR7910144</a> | Pm_02              | <i>Peropteryx macrotis</i>      | 2    |
| <a href="#">SRR7910145</a> | NI_02‡             | <i>Nyctinomops laticaudatus</i> | 0    |
| <a href="#">SRR7910146</a> | NI_03‡             | <i>Nyctinomops laticaudatus</i> | 0    |
| <a href="#">SRR7910147</a> | Mk_01‡             | <i>Myotis keaysi</i>            | 0    |
| <a href="#">SRR7910148</a> | Mk_02‡             | <i>Myotis keaysi</i>            | 0    |
| <a href="#">SRR7910149</a> | Mm_02‡             | <i>Mormoops megalophylla</i>    | 0    |
| <a href="#">SRR7910150</a> | Mm_03‡             | <i>Mormoops megalophylla</i>    | 0    |
| <a href="#">SRR7910151</a> | Aj_03‡             | <i>Artibeus jamaicensis</i>     | 0    |
| <a href="#">SRR7910152</a> | Mm_01‡             | <i>Mormoops megalophylla</i>    | 0    |
| <a href="#">SRR7910153</a> | Aj_01‡             | <i>Artibeus jamaicensis</i>     | 0    |
| <a href="#">SRR7910154</a> | Aj_02‡             | <i>Artibeus jamaicensis</i>     | 0    |
| <a href="#">SRR7910155</a> | Mk_03‡             | <i>Myotis keaysi</i>            | 0    |
| <a href="#">SRR7910156</a> | NI_01‡             | <i>Nyctinomops laticaudatus</i> | 0    |
| <a href="#">SRR4256025</a> | Deer-Liver-1-male  | <i>Odocoileus virginianus</i>   | 0    |
| <a href="#">SRR4256026</a> | Deer-Antler-2-male | <i>Odocoileus virginianus</i>   | 12   |
| <a href="#">SRR4256027</a> | Deer-Bone-1-male   | <i>Odocoileus virginianus</i>   | 0    |
| <a href="#">SRR4256028</a> | Deer-Liver-2-male  | <i>Odocoileus virginianus</i>   | 0    |
| <a href="#">SRR4256029</a> | Deer-Lung-1-male   | <i>Odocoileus virginianus</i>   | 0    |
| <a href="#">SRR4256030</a> | Deer-Brain-2-male  | <i>Odocoileus virginianus</i>   | 12   |
| <a href="#">SRR4256031</a> | Deer-Muscle-2-male | <i>Odocoileus virginianus</i>   | 14   |
| <a href="#">SRR4256032</a> | Deer-Testis-1-male | <i>Odocoileus virginianus</i>   | 0    |
| <a href="#">SRR4256033</a> | Deer-Pedicle-male* | <i>Odocoileus virginianus</i>   | 9265 |
| <a href="#">SRR4256034</a> | Deer-Testis-2-male | <i>Odocoileus virginianus</i>   | 7    |

853

854 \* Pools in which full deltavirus genomes were detected



855 †Pools in which DrDV was detected in the saliva of one or more individuals in the pool by RT-PCR, but  
856 were negative for deltavirus detection through metagenomics

857 ‡Species in which deltaviruses were not detected but which came from the same study

858 §*D. rotundus* samples represent saliva (SV) and fecal (F/H) samples pooled across multiple individuals  
859 from different sites. Samples from other Neotropical bats (*P. macrotis*, *N. laticaudatus*, *M. keaysi*, *M.*  
860 *megalophylla*, *A. jamaicensis*) represent liver samples from unique individuals. *O. virginianus* samples  
861 represent different tissues pooled across multiple individuals. Read mapping of samples from different  
862 individuals and time points to the MmonDV genome is described in (1)

863 ¶Samples from *D. rotundus* were mapped to DrDV-A and DrDV-B genomes. All *D. rotundus* read counts  
864 refer to DrDV-B genomes unless specifically noted as DrDV-A. In the case of libraries with matches to  
865 both, the number of reads mapping is broken down by DrDV-genome. Samples from *P. macrotis*, *N.*  
866 *laticaudatus*, *M. keaysi*, *M. megalophylla*, *A. jamaicensis* were mapped to the PmacDV genome. Samples  
867 from *O. virginianus* were mapped to OvirDV.

868

869 **Table S3. Summary statistics for bat deltavirus genomes and protein domain homology**  
870 **analysis of predicted DrDV small delta antigens from saliva metagenomic pools.**

871

| Site  | Lineage | Genome (nt) | GC content (%) | Intramolecular base pairing (%) | Delta antigen (aa) | Hhpred top hit  | Probability top hit | e-value  | Identity top hit (%) | Genbank accession |
|-------|---------|-------------|----------------|---------------------------------|--------------------|-----------------|---------------------|----------|----------------------|-------------------|
| AYA14 | DrDV-A  | 1694        | 55             | 73.8                            | 194                | Oligomerization | 99.86               | 2.8e-25  | 59                   | MT649207          |
| AYA11 | DrDV-B  | 1692        | 54.3           | 75.3                            | 196                | domain of       | 99.86               | 5.60E-25 | 45                   | MT649206          |
| CAJ1  | DrDV-B  | 1692        | 53.8           | 74.3                            | 196                | hepatitis delta | 99.86               | 5.40E-25 | 45                   | MT649208          |
| LMA6  | DrDV-B  | 1694        | 54.3           | 74.6                            | 196                | antigen         | 99.85               | 8.30E-25 | 45                   | MT649209          |

872

873

874 **Table S4. Primers used to screen samples for DrDV by RT-PCR and HBV by PCR.**

875

| Primer               | PCR Round | Sequence (5'-3')           |
|----------------------|-----------|----------------------------|
| DrDV-A               |           |                            |
| DrDV_F1_GenoA        | 1&2       | AGGGGTCTTTTTGGGAAATT       |
| DrDV_R1_GenoA        | 1         | AAGAAGAAGCAACTATCCGG       |
| DrDV_R2_GenoA        | 2         | CATCCAAGAGACCAAGAGAG       |
| DrDV-B               |           |                            |
| DrDV_F1_GenoB        | 1         | TTCCCTTG YTGCTCCAGTTG      |
| DrDV_R1_GenoB        | 1         | CGGTAAGAAGAAACCTCCAA       |
| DrDV_F2_GenoB        | 2         | CCAGTTGTTTCTTCTTGTTCTC     |
| DrDV_R2_GenoB        | 2         | AAAAAGAAAGAGAGAACTGGAAAAA  |
| DrDV Delta Antigen   |           |                            |
| DeltaAntigenF1_GenoB | 1         | TCTGGTCTTATCTTTCTTACCTTAT  |
| DeltaAntigenR1_GenoB | 1         | AAACCTTCCTTTATTCTATTTTCGAA |
| DeltaAntigenR1_GenoA | 1         | CCTTTACCTTTAATTCTCTTG GTAA |
| DeltaAntigenF1_GenoA | 1         | GCCTCGAATAATAAGAAGAAAATTT  |
| HBV Primers*         |           |                            |
| HBV-F248             | 1&2       | CTAGATTBGTGGTGGACTTCTCTCA  |
| HBV-R397             | 2         | GATARAACGCCGCAGATACATCCA   |
| HBV-R450a            | 1         | TCCAGGAGAACCAAYAAGAAAGTGA  |
| HBV-R450b            | 1         | TCCAGGAGAACCAAYAAGAAAGTGA  |

876

877 \*Primer sequences and PCR protocol described in (38)

878

879

880

881 **Table S5. Colony level demographic characteristics and PCR-based screening results of**  
 882 **vampire bat blood and saliva for DrDV and HBV.**

883

| Colony | Prop Male* | Prop Adult† | DrDV-A |       | DrDV-B |       | HBV    |       |
|--------|------------|-------------|--------|-------|--------|-------|--------|-------|
|        |            |             | Saliva | Blood | Saliva | Blood | Saliva | Blood |
| AYA1   | 0.6        | 1           | 0/20   | 0/20  | 3/20   | 0     | 0/3    | 0/20  |
| AYA11  | 0.6        | 0.95        | 0/20   | 0/20  | 2/20   | 0     | 0/3    | 0/20  |
| AYA14  | 0.4        | 0.65        | 1/20   | 0/20  | 4/20   | 0     | 0/8    | 0/20  |
| AYA15  | 0.55       | 0.75        | 0/20   | 0     | 0/20   | 0     | 0      | 0     |
| CAJ1   | 0.75       | 0.9         | 0/20   | 0     | 5/20   | 0/20  | 0/10   | 0/20  |
| CAJ2   | 0.55       | 0.95        | 0/20   | 0     | 6/20   | 6/20  | 0/6    | 0/20  |
| CAJ3   | 0.7        | 1           | 0/20   | 0     | 4/20   | 0     | 0/4    | 0     |
| CAJ4   | 0.35       | 0.75        | 0/20   | 0     | 2/20   | 0     | 0/2    | 0     |
| LMA4   | 0.65       | 0.75        | 0/20   | 0     | 0/20   | 0     | 0/1    | 0     |
| LMA5   | 0.65       | 0.9         | 0/20   | 0     | 5/20   | 0     | 0/5    | 0     |
| LMA6   | 0.35       | 1           | 0/20   | 0     | 7/20   | 4/20  | 0/9    | 0/19  |
| LMA12  | 0.5        | 0.9         | 0/20   | 0     | 3/20   | 0     | 0/3    | 0     |
| Total  | -          | -           | 1/240  | 0/60  | 41/240 | 10/60 | 0/54   | 0/119 |

884

885 \*Proportion of males at each colony (alternative is females)

886 †Proportion of adults at each colony (alternatives are juveniles or subadults)

887

888 **Table S6. Test of association between DrDV-B phylogeny and sample location at the**  
 889 **regional (department) and colony level.**

890

| Level  | Index       | Observed value (95% CI) | Null value (95% CI) | p-value |
|--------|-------------|-------------------------|---------------------|---------|
| Region | AI*         | 0.22 (0-0.58)           | 2.46 (1.95-2.94)    | 0       |
|        | PS†         | 4 (3-5)                 | 17.73 (15.41-19.35) | 0       |
|        | MC‡ (LMA)   | 9.29 (5-14)             | 1.97 (1.41-2.98)    | 0.001   |
|        | MC‡ (CAJ)   | 11.24 (9-19)            | 2.81 (2.12-3.94)    | 0.001   |
|        | MC‡ (AYA)   | 2.67 (1-5)              | 1.26 (1-1.96)       | 0.02    |
| Colony | AI*         | 2.23 (1.69-2.76)        | 3.63 (3.21-3.92)    | 0       |
|        | PS†         | 19.19 (18-20)           | 29.23 (27.45-30.81) | 0       |
|        | MC‡ (LMA6)  | 4.98 (5-5)              | 1.18 (1-1.94)       | 0.001   |
|        | MC‡ (LMA5)  | 2.52 (1-3)              | 1.13 (1-1.43)       | 0.002   |
|        | MC‡ (CAJ2)  | 3.21 (2-6)              | 1.57 (1.14-2.39)    | 0.01    |
|        | MC‡ (CAJ1)  | 1 (1-1)                 | 1.13 (1-1.53)       | 1       |
|        | MC‡ (AYA1)  | 1.09 (1-2)              | 1.01 (1-1.05)       | 1       |
|        | MC‡ (CAJ3)  | 1.01 (1-1)              | 1.07 (1-1.32)       | 1       |
|        | MC‡ (AYA11) | 1.03 (1-1)              | 1.01 (1-1.05)       | 1       |
|        | MC‡ (AYA14) | 1.05 (1-2)              | 1.04 (1-1.15)       | 1       |
|        | MC‡ (CAJ4)  | 1.16 (1-2)              | 1.01 (1-1.05)       | 1       |
|        | MC‡ (LMA12) | 1 (1-1)                 | 1.04 (1-1.15)       | 1       |

891

892 \*Association Index

893 † Parsimony Score

894 ‡ Monophyletic Clade size

895

## 896 Supplementary References

897

- 898 1. R. C. Edgar *et al.*, Petabase-scale sequence alignment catalyses viral discovery. *bioRxiv*,  
899 1–30 (2020).
- 900 2. L. M. Bergner *et al.*, Using noninvasive metagenomics to characterize viral communities  
901 from wildlife. *Mol Ecol Resour.* **19**, 128–143 (2019).
- 902 3. L. M. Bergner *et al.*, Demographic and environmental drivers of metagenomic viral  
903 diversity in vampire bats. *Mol Ecol.* **29**, 26–39 (2020).
- 904 4. A. Bankevich *et al.*, SPAdes: A New Genome Assembly Algorithm and Its Applications  
905 to Single-Cell Sequencing. *J Comput Biol.* **19**, 455–477 (2012).
- 906 5. M. Kearse *et al.*, Geneious Basic: An integrated and extendable desktop software platform  
907 for the organization and analysis of sequence data. *Bioinformatics.* **28**, 1647–1649 (2012).
- 908 6. P. Rice, I. Longden, A. Bleasby, EMBOSS: The European molecular biology open  
909 software suite. *Trends Genet.* **16**, 276–277 (2000).
- 910 7. K. Katoh, K. Misawa, K.-I. Kuma, T. Miyata, MAFFT: a novel method for rapid multiple  
911 sequence alignment based on fast Fourier transform. *Nucleic Acids Res.* **30**, 3059–3066  
912 (2002).
- 913 8. J. Söding, A. Biegert, A. N. Lupas, The HHpred interactive server for protein homology  
914 detection and structure prediction. *Nucleic Acids Res.* **33**, W244–W248 (2005).
- 915 9. M. Wille *et al.*, A Divergent Hepatitis D-Like Agent in Birds. *Viruses.* **10**, 720–9 (2018).
- 916 10. U. Hetzel *et al.*, Identification of a Novel Deltavirus in Boa Constrictors. *mBio.* **10**, 1447–  
917 8 (2019).
- 918 11. M. Zuker, Mfold web server for nucleic acid folding and hybridization prediction. *Nucleic  
919 Acids Res.* **31**, 3406–3415 (2003).
- 920 12. S. Bellaousov, J. S. Reuter, M. G. Seetin, D. H. Mathews, RNAstructure: Web servers for  
921 RNA secondary structure prediction and analysis. *Nucleic Acids Res.* **41**, W471–W474  
922 (2013).
- 923 13. S. L. Kosakovsky Pond, D. Posada, M. B. Gravenor, C. H. Woelk, S. D. W. Frost, GARD:  
924 a genetic algorithm for recombination detection. *Bioinformatics.* **22**, 3096–3098 (2006).
- 925 14. S. Weaver *et al.*, Datamonkey 2.0: A Modern Web Application for Characterizing  
926 Selective and Other Evolutionary Processes. *Mol Biol Evol.* **35**, 773–777 (2018).
- 927 15. H. Li, R. Durbin, Fast and accurate short read alignment with Burrows-Wheeler  
928 transform. *Bioinformatics.* **25**, 1754–1760 (2009).

- 929 16. D. D. Moreno-Santillán, C. Machain-Williams, G. Hernández-Montes, J. Ortega, De Novo  
930 Transcriptome Assembly and Functional Annotation in Five Species of Bats. *Sci Rep.* **9**,  
931 6222–12 (2019).
- 932 17. C. M. Seabury *et al.*, Genome-Wide Polymorphism and Comparative Analyses in the  
933 White-Tailed Deer (*Odocoileus virginianus*): A Model for Conservation Genomics. *PLOS*  
934 *ONE.* **6**, e15811–9 (2011).
- 935 18. S. P. Fletcher *et al.*, Intrahepatic Transcriptional Signature Associated with Response to  
936 Interferon- $\alpha$  Treatment in the Woodchuck Model of Chronic Hepatitis B. *PLoS Pathog.*  
937 **11**, e1005103–30 (2015).
- 938 19. R Core Team, R: A language and environment for statistical computing. R Foundation for  
939 Statistical Computing. (available at [www.r-project.org](http://www.r-project.org)) (2019).
- 940 20. K. E. Jones *et al.*, PanTHERIA: a species-level database of life history, ecology, and  
941 geography of extant and recently extinct mammals. *Ecology.* **90**, 2648–2648 (2009).
- 942 21. S. Kalyaanamoorthy, B. Q. Minh, T. K. F. Wong, A. von Haeseler, L. S. Jermini,  
943 ModelFinder: fast model selection for accurate phylogenetic estimates. *Nat Meth.* **14**,  
944 587–589 (2017).
- 945 22. B. Q. Minh *et al.*, IQ-TREE 2: New Models and Efficient Methods for Phylogenetic  
946 Inference in the Genomic Era. *Mol Biol Evol.* **37**, 1530–1534 (2020).
- 947 23. A. J. Drummond, M. A. Suchard, D. Xie, A. Rambaut, Bayesian phylogenetics with  
948 BEAUti and the BEAST 1.7. *Mol Biol Evol.* **29**, 1969–1973 (2012).
- 949 24. J. A. Balbuena, R. Míguez-Lozano, I. Blasco-Costa, PACo: A Novel Procrustes  
950 Application to Cophylogenetic Analysis. *PLOS ONE.* **8**, e61048 (2013).
- 951 25. M. C. Hutchinson, E. F. Cagua, J. A. Balbuena, D. B. Stouffer, T. Poisot, paco:  
952 implementing Procrustean Approach to Cophylogeny in R. *Methods Ecol Evol.* **8**, 932–  
953 940 (2017).
- 954 26. P. Legendre, Y. Desdevises, E. Bazin, A Statistical Test for Host–Parasite Coevolution.  
955 *Syst Biol.* **51**, 217–234 (2002).
- 956 27. E. Paradis, K. Schliep, ape 5.0: an environment for modern phylogenetics and  
957 evolutionary analyses in R. *Bioinformatics.* **35**, 526–528 (2019).
- 958 28. K. P. Schliep, phangorn: phylogenetic analysis in R. *Bioinformatics.* **27**, 592–593 (2010).
- 959 29. L. J. Revell, phytools: an R package for phylogenetic comparative biology (and other  
960 things). *Methods Ecol Evol.* **3**, 217–223 (2011).

- 961 30. G. Yu, D. K. Smith, H. Zhu, Y. Guan, T. T.-Y. Lam, ggtree: an rpackage for visualization  
962 and annotation of phylogenetic trees with their covariates and other associated data.  
963 *Methods Ecol Evol.* **8**, 28–36 (2016).
- 964 31. F. M. Martins, A. D. Ditchfield, D. Meyer, J. S. Morgante, Mitochondrial DNA  
965 phylogeography reveals marked population structure in the common vampire bat,  
966 *Desmodus rotundus* (Phyllostomidae). *J Zool Syst Evol Res.* **45**, 372–378 (2007).
- 967 32. S. Capella-Gutiérrez, J. M. Silla-Martínez, T. Gabaldón, trimAl: a tool for automated  
968 alignment trimming in large-scale phylogenetic analyses. *Bioinformatics.* **25**, 1972–1973  
969 (2009).
- 970 33. D. Darriba, G. L. Taboada, R. Doallo, D. Posada, jModelTest 2: more models, new  
971 heuristics and parallel computing. *Nat Meth.* **9**, 772–772 (2012).
- 972 34. F. Ronquist *et al.*, MrBayes 3.2: efficient Bayesian phylogenetic inference and model  
973 choice across a large model space. *Syst Biol.* **61**, 539–542 (2012).
- 974 35. J. Parker, A. Rambaut, O. G. Pybus, Correlating viral phenotypes with phylogeny:  
975 Accounting for phylogenetic uncertainty. *Infect Genet Evol.* **8**, 239–246 (2008).
- 976 36. D. Bates, M. Mächler, Bolker, S. Walker, Fitting Linear Mixed-Effects Models Using  
977 lme4. *J. Stat Softw.* **67** (2015), doi:10.18637/jss.v067.i01.
- 978 37. J. Fox, S. Weisberg, *An R Companion to Applied Regression* (Sage, Thousand Oaks, CA,  
979 Second Edition. 2011).
- 980 38. J. F. Drexler *et al.*, Bats carry pathogenic hepadnaviruses antigenically related to hepatitis  
981 B virus and capable of infecting human hepatocytes. *Proc Natl Acad Sci USA.* **110**,  
982 16151–16156 (2013).
- 983 39. B. Buchfink, C. Xie, D. H. Huson, Fast and sensitive protein alignment using DIAMOND.  
984 *Nat Meth.* **12**, 59–60 (2014).
- 985 40. K. D. Pruitt, T. Tatusova, D. R. Maglott, NCBI reference sequences (RefSeq): a curated  
986 non-redundant sequence database of genomes, transcripts and proteins. *Nucleic Acids Res.*  
987 **35**, D61–D65 (2007).
- 988 41. B. D. Ondov, N. H. Bergman, A. M. Phillippy, Interactive metagenomic visualization in a  
989 Web browser. *BMC Bioinformatics*, 385 (2011).
- 990 42. D. H. Huson *et al.*, MEGAN Community Edition - Interactive Exploration and Analysis of  
991 Large-Scale Microbiome Sequencing Data. *PLoS Comput Biol.* **12**, e1004957–12 (2016).
- 992 43. J. L. Casey, K. F. Bergmann, T. L. Brown, J. L. Gerin, Structural requirements for RNA  
993 editing in hepatitis delta virus: evidence for a uridine-to-cytidine editing mechanism. *Proc*  
994 *Natl Acad Sci USA.* **89**, 7149–7153 (1992).



- 995 44. S. B. Hwang, M. Lai, Isoprenylation Mediates Direct Protein-Protein Interactions  
996 Between Hepatitis Large Delta-Antigen and Hepatitis-B Virus Surface-Antigen. *J Virol.*  
997 **67**, 7659–7662 (1993).
- 998 45. C.-H. T. Webb, A. Lupták, HDV-like self-cleaving ribozymes. *RNA Biol.* **8**, 719–727  
999 (2014).
